# Supplementary material
Source: PubMed Central journal article supplement (PMC8578299)
Supplement: NIHMS1728187-supplement-1.pdf [file NIHMS1728187-supplement-1.pdf]

Supplementary Table 1. SNPs underlying the pathway-based genetic risk scores for age-related macular degeneration.

| <b>Suggested Pathway of AMD Locus</b> | <b>dbSNP ID</b> | <b>Chr</b> | <b>Pos. (hg19)</b> | <b>RefSeq Gene Closest to SNP</b> | <b>Risk Allele</b> | <b>Other Allele</b> | <b>Weight / log(OR)</b> |
|---------------------------------------|-----------------|------------|--------------------|-----------------------------------|--------------------|---------------------|-------------------------|
| Complement Pathways                   | rs187328863     | 1          | 196380158          | <i>KCNT2</i>                      | T                  | C                   | 0.38623                 |
| Complement Pathways                   | rs148553336     | 1          | 196613173          | <i>CFH</i>                        | T                  | C                   | 1.1637                  |
| Complement Pathways                   | rs570618        | 1          | 196657064          | <i>CFH</i>                        | T                  | G                   | 0.55141                 |
| Complement Pathways                   | rs10922109      | 1          | 196704632          | <i>CFH</i>                        | C                  | A                   | 0.66958                 |
| Complement Pathways                   | rs35292876      | 1          | 196706642          | <i>CFH</i>                        | T                  | C                   | 0.43398                 |
| Complement Pathways                   | rs121913059     | 1          | 196716375          | <i>CFH</i>                        | T                  | C                   | 3.8635                  |
| Complement Pathways                   | rs61818925      | 1          | 196815450          | <i>CFHR1</i>                      | T                  | G                   | 0.16257                 |
| Complement Pathways                   | rs191281603     | 1          | 196958651          | <i>CFHR5</i>                      | C                  | G                   | 0.89702                 |
| Extracellular Matrix Remodeling       | rs11884770      | 2          | 228086920          | <i>LOC654841</i>                  | C                  | T                   | 0.080248                |
| Extracellular Matrix Remodeling       | rs62247658      | 3          | 64715155           | <i>ADAMTS9</i>                    | C                  | T                   | 0.12671                 |
| Extracellular Matrix Remodeling       | rs140647181     | 3          | 99180668           | <i>COL8A1</i>                     | C                  | T                   | 0.61508                 |
| Extracellular Matrix Remodeling       | rs55975637      | 3          | 99419853           | <i>COL8A1</i>                     | A                  | G                   | 0.14899                 |
| Complement Pathways                   | rs10033900      | 4          | 110659067          | <i>CFI</i>                        | T                  | C                   | 0.1427                  |
| Complement Pathways                   | rs141853578     | 4          | 110685820          | <i>CFI</i>                        | T                  | C                   | 1.633                   |
| ...                                   | rs114092250     | 5          | 35494448           | <i>SPEF2</i>                      | G                  | A                   | 0.33716                 |
| Complement Pathways                   | rs62358361      | 5          | 39327888           | <i>C9</i>                         | T                  | G                   | 0.51329                 |
| Complement Pathways                   | rs116503776     | 6          | 31930462           | <i>SKIV2L</i>                     | G                  | A                   | 0.66418                 |
| Complement Pathways                   | rs144629244     | 6          | 31946792           | <i>STK19</i>                      | A                  | G                   | 1.0253                  |
| Complement Pathways                   | rs181705462     | 6          | 31947027           | <i>STK19</i>                      | T                  | G                   | 0.44737                 |
| Complement Pathways                   | rs114254831     | 6          | 32155581           | <i>PBX2</i>                       | G                  | A                   | 0.12483                 |
| Extracellular Matrix Remodeling       | rs943080        | 6          | 43826627           | <i>LINC01512</i>                  | T                  | C                   | 0.13934                 |
| ...                                   | rs7803454       | 7          | 99991548           | <i>PILRA</i>                      | T                  | C                   | 0.14304                 |
| ...                                   | rs1142          | 7          | 104756326          | <i>SRPK2</i>                      | T                  | C                   | 0.13057                 |
| ...                                   | rs79037040      | 8          | 23082971           | <i>LOC389641</i>                  | T                  | G                   | 0.11331                 |
| ...                                   | rs71507014      | 9          | 73438605           | <i>TRPM3</i>                      | G                  | GC                  | 0.11024                 |
| ...                                   | rs10781182      | 9          | 76617720           | <i>LOC101927358</i>               | T                  | G                   | 0.10031                 |
| ...                                   | rs1626340       | 9          | 101923372          | <i>TGFBR1</i>                     | G                  | A                   | 0.12318                 |
| Lipid Metabolism                      | rs2740488       | 9          | 107661742          | <i>ABCA1</i>                      | A                  | C                   | 0.11123                 |
| ...                                   | rs12357257      | 10         | 24999593           | <i>ARHGAP21</i>                   | A                  | G                   | 0.11008                 |
| <i>ARMS2/HTRA1</i>                    | rs3750846       | 10         | 124215565          | <i>ARMS2</i>                      | C                  | T                   | 1.0744                  |
| ...                                   | rs3138141       | 12         | 56115778           | <i>FAM138D</i>                    | A                  | C                   | 0.16536                 |
| ...                                   | rs61941274      | 12         | 112132610          | <i>ACAD10</i>                     | A                  | G                   | 0.46924                 |
| ...                                   | rs9564692       | 13         | 31821240           | <i>B3GLCT</i>                     | C                  | T                   | 0.10425                 |
| ...                                   | rs61985136      | 14         | 68769199           | <i>RAD51B</i>                     | T                  | C                   | 0.12523                 |
| ...                                   | rs2842339       | 14         | 68986999           | <i>OR11H12</i>                    | G                  | A                   | 0.16483                 |
| Lipid Metabolism                      | rs2043085       | 15         | 58680954           | <i>LIPC</i>                       | C                  | T                   | 0.14337                 |
| Lipid Metabolism                      | rs2070895       | 15         | 58723939           | <i>LIPC</i>                       | G                  | A                   | 0.15207                 |
| Lipid Metabolism                      | rs17231506      | 16         | 56994528           | <i>CETP</i>                       | T                  | C                   | 0.10813                 |
| Lipid Metabolism                      | rs5817082       | 16         | 56997349           | <i>CETP</i>                       | C                  | CA                  | 0.13584                 |
| ...                                   | rs72802342      | 16         | 75234872           | <i>CTRB2</i>                      | C                  | A                   | 0.22983                 |
| Complement Pathways                   | rs11080055      | 17         | 26649724           | <i>TMEM97</i>                     | C                  | A                   | 0.083858                |
| ...                                   | rs6565597       | 17         | 79526821           | <i>NPLOC4</i>                     | T                  | C                   | 0.10928                 |
| ...                                   | rs67538026      | 19         | 1031438            | <i>CNN2</i>                       | C                  | T                   | 0.1053                  |
| Complement Pathways                   | rs12019136      | 19         | 5835677            | <i>FUT6</i>                       | G                  | A                   | 0.29875                 |
| Complement Pathways                   | rs147859257     | 19         | 6718146            | <i>C3</i>                         | G                  | T                   | 1.1683                  |
| Complement Pathways                   | rs2230199       | 19         | 6718387            | <i>C3</i>                         | G                  | C                   | 0.38789                 |
| Lipid Metabolism                      | rs429358        | 19         | 45411941           | <i>APOE</i>                       | T                  | C                   | 0.39882                 |
| Lipid Metabolism                      | rs73036519      | 19         | 45748362           | <i>MARK4</i>                      | G                  | C                   | 0.092776                |
| ...                                   | rs142450006     | 20         | 44614991           | <i>ZNF335</i>                     | TTTTTC             | T                   | 0.17438                 |
| ...                                   | rs201459901     | 20         | 56653724           | <i>C20orf85</i>                   | T                  | TA                  | 0.28024                 |
| Extracellular Matrix Remodeling       | rs5754227       | 22         | 33105817           | <i>TIMP3</i>                      | T                  | C                   | 0.23796                 |
| ...                                   | rs8135665       | 22         | 38476276           | <i>SLC16A8</i>                    | T                  | C                   | 0.13406                 |

Supplementary Figure 1. Scree plot showing the proportion of variance explained by each principal component, following principal components analysis applied to the cross-sectional dataset of phenotypic characteristics.

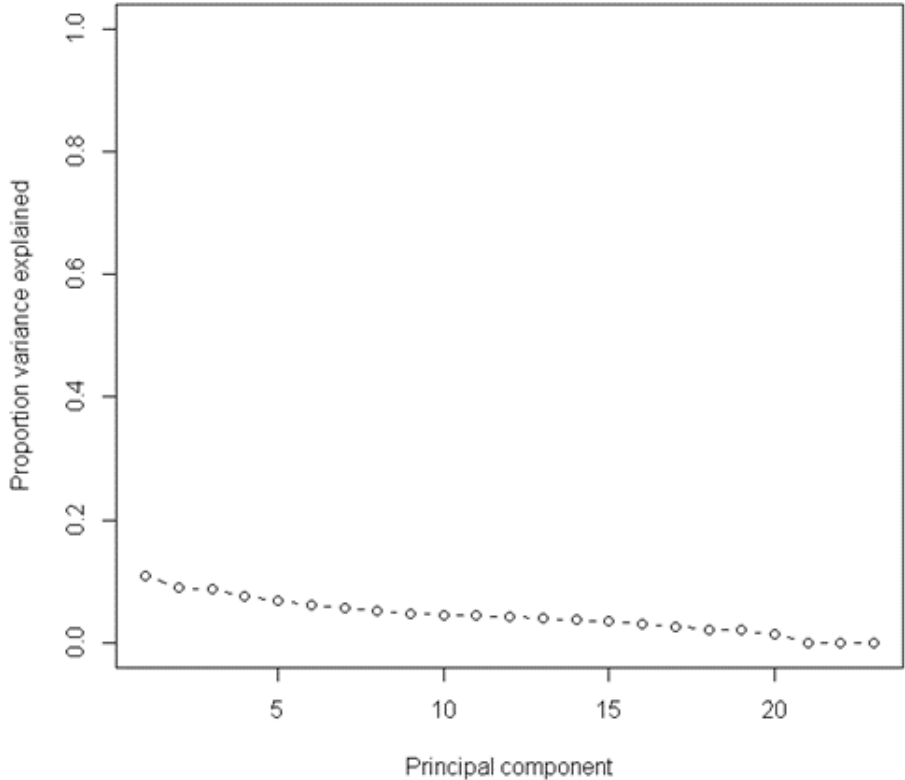

Supplementary Figure 2. Plot showing the proportion of the unexplained sums of squares according to cluster number, following k-means cluster analysis applied to the cross-sectional dataset of phenotypic characteristics.

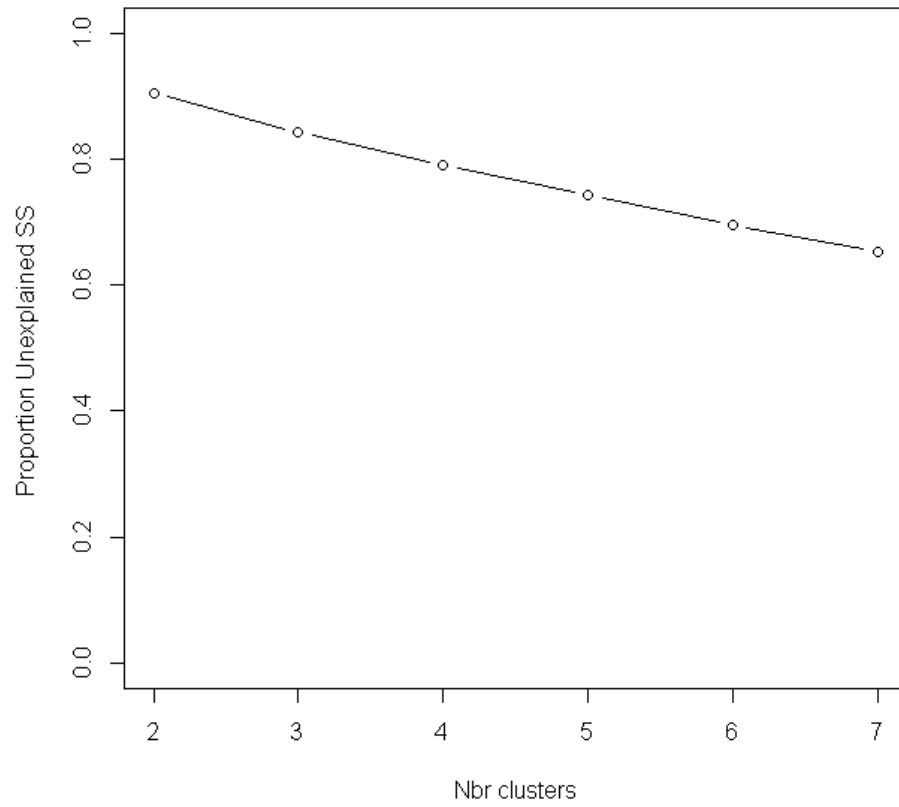

Supplementary Figure 3. Plot showing the Calinski-Harabasz scores according to cluster number, following k-means cluster analysis applied to the cross-sectional dataset of phenotypic characteristics.

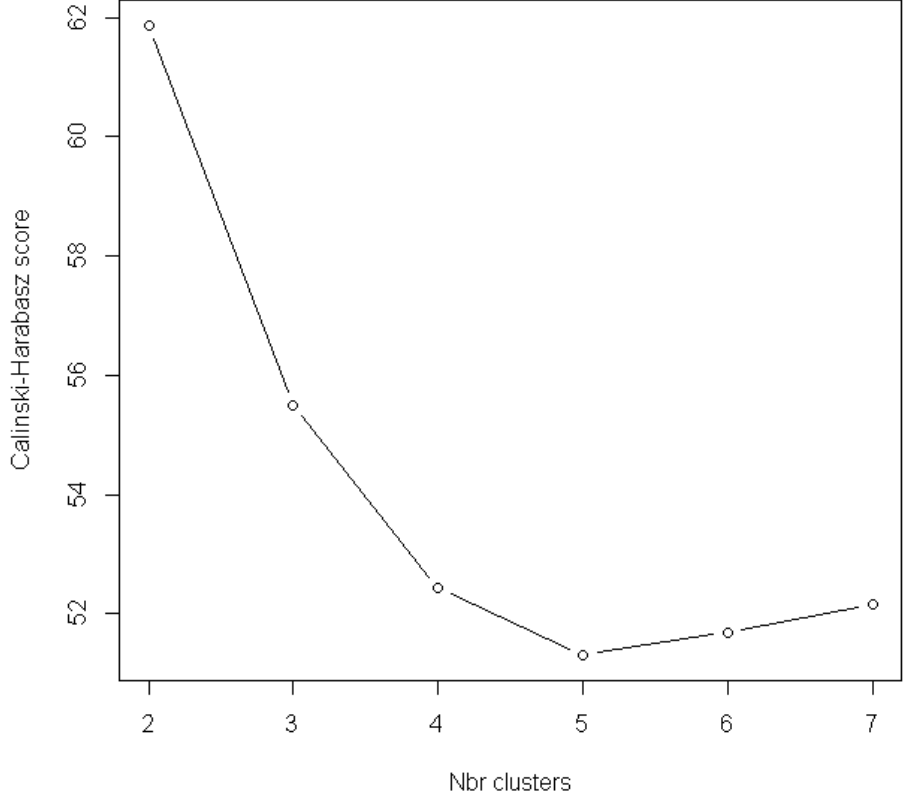

Supplementary Figure 4. Dendrograms following agglomerative hierarchical cluster analysis applied to the cross-sectional dataset of phenotypic characteristics, according to linkage type. Dissimilarity is plotted on the y-axis and each participant is shown on the x-axis. Each horizontal line represents the fusion of a pair of clusters, with the height of the segment showing the dissimilarity between the members of the pair. Clusters that fuse near the bottom of the tree are more similar, while clusters that fuse near the top are less similar.

Single linkage (cophenetic correlation coefficient 0.83)

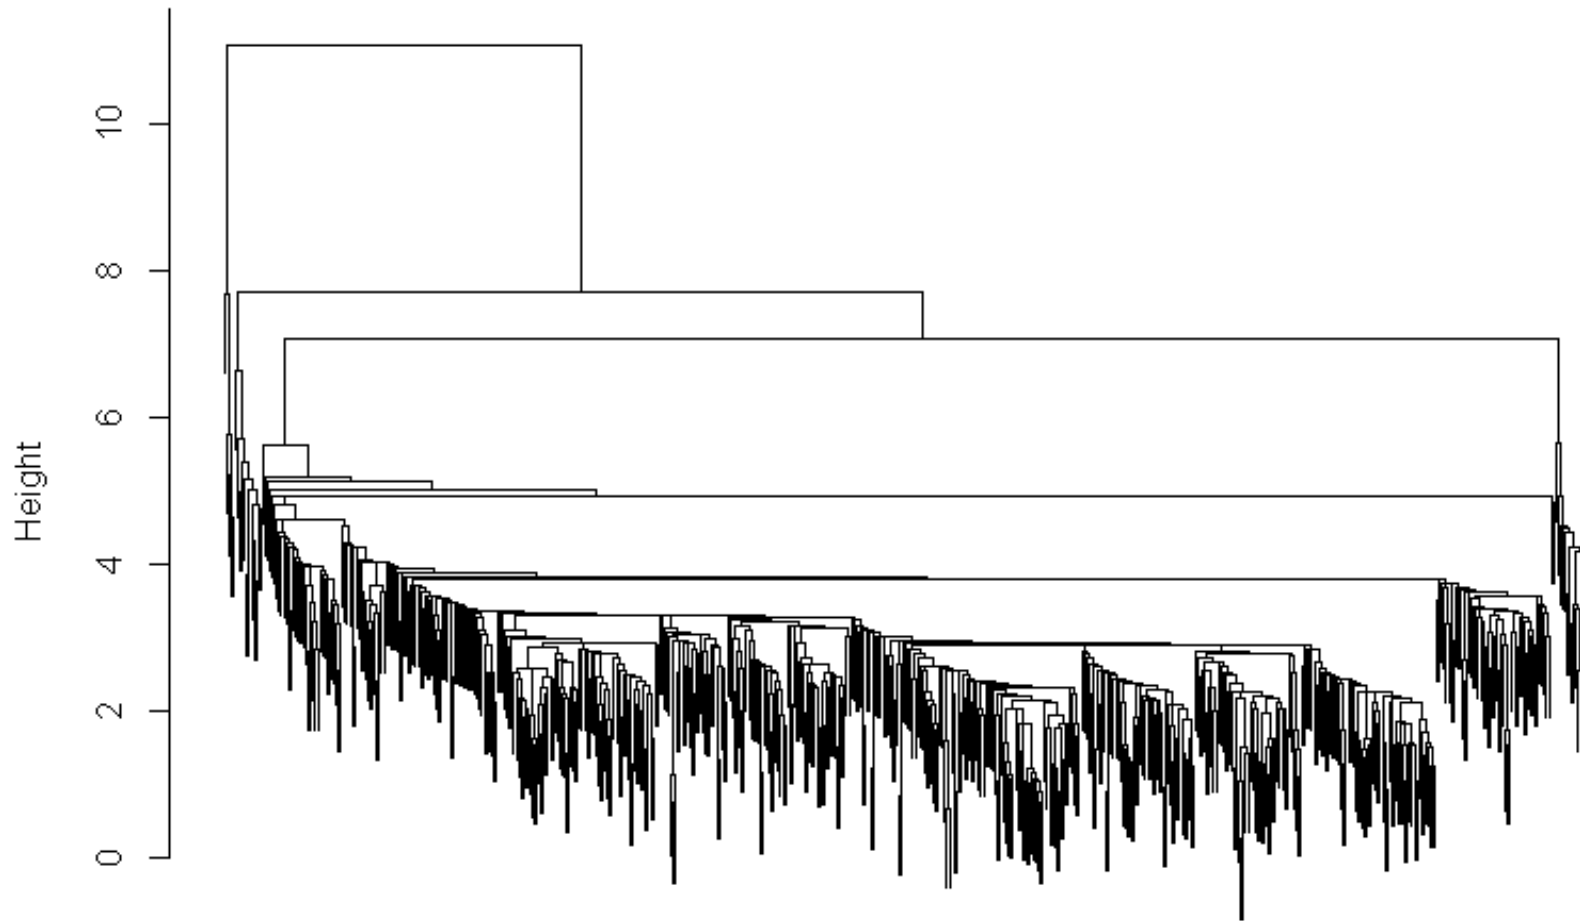

Average linkage (cophenetic correlation coefficient 0.88)

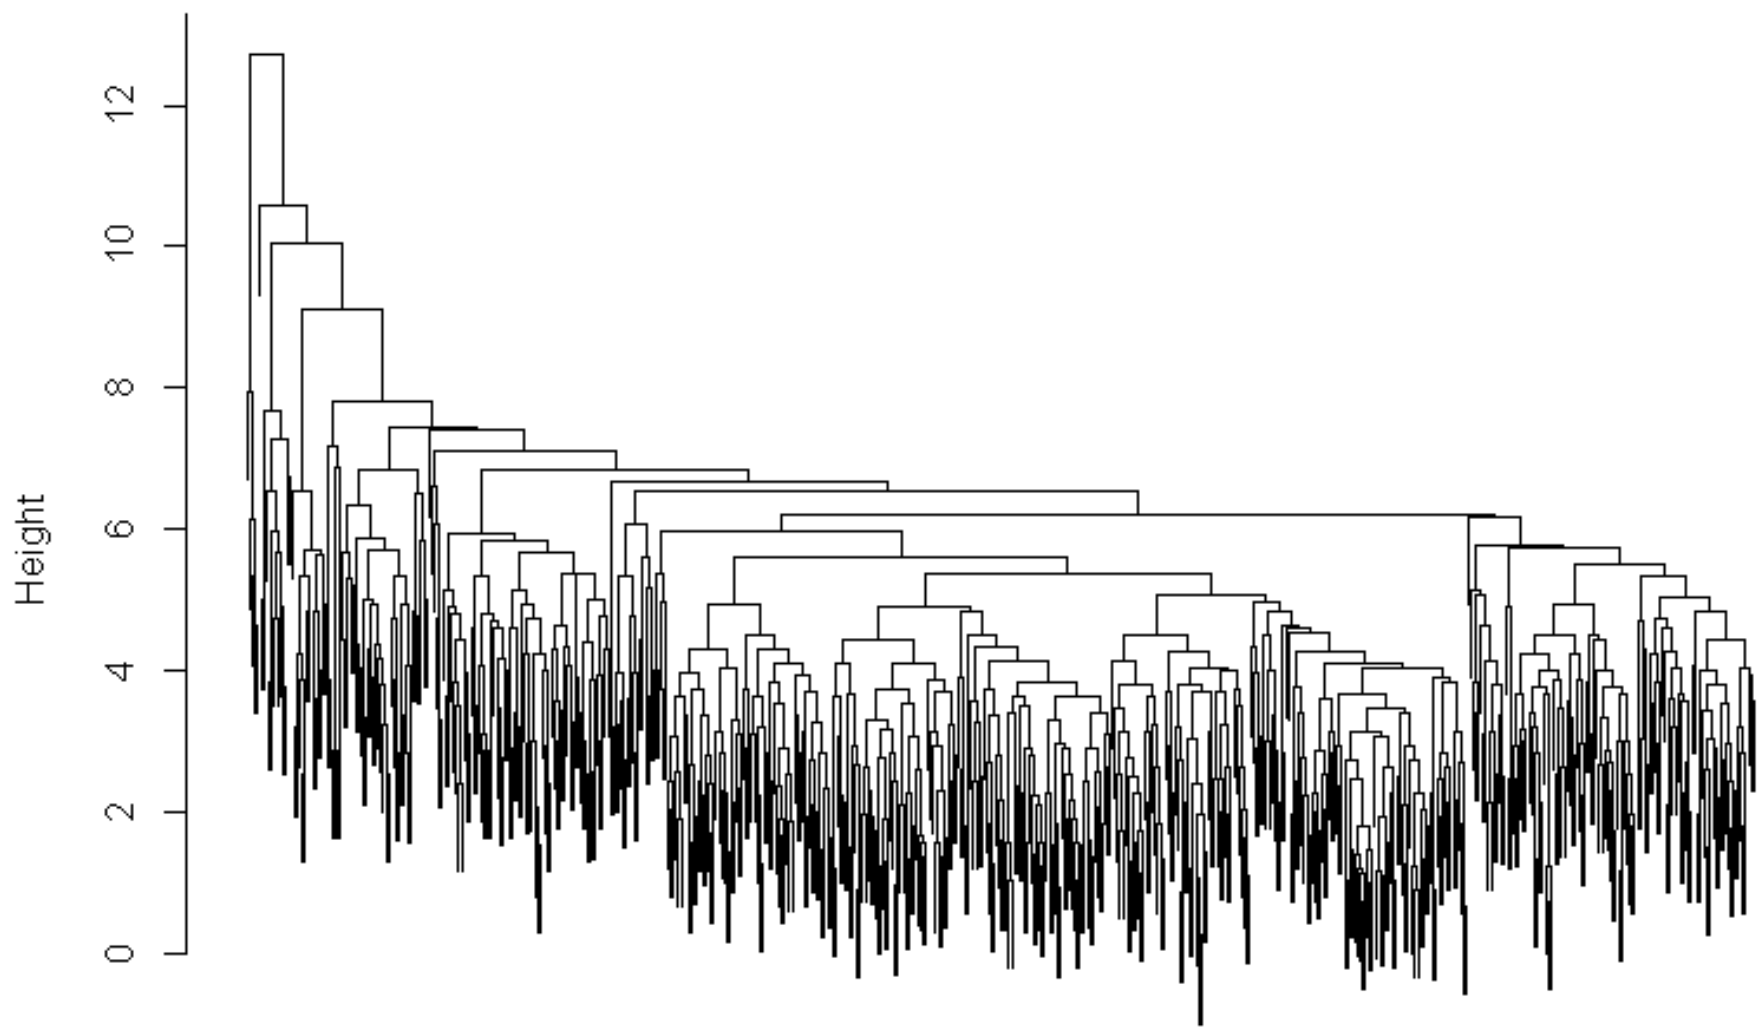

Complete linkage (cophenetic correlation coefficient 0.63)

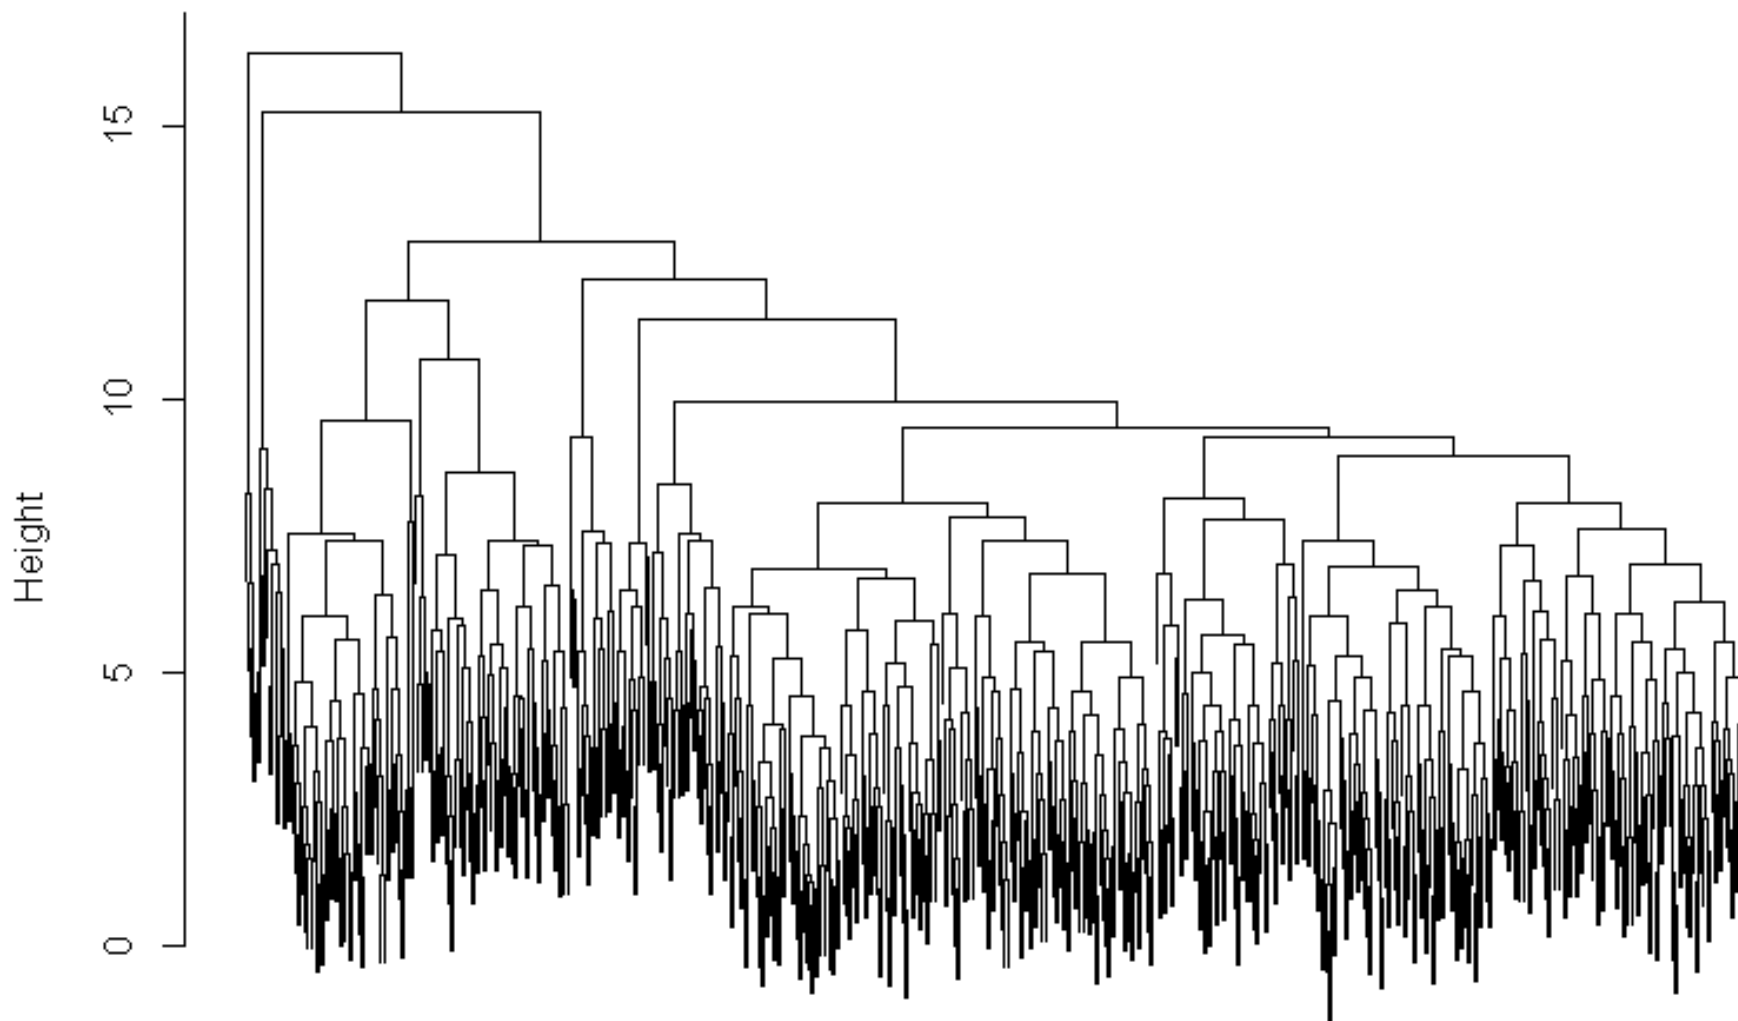

Supplementary Figure 5. Plot showing the Calinski-Harabasz scores according to cluster number, following agglomerative hierarchical cluster analysis applied to the cross-sectional dataset of phenotypic characteristics, according to linkage type.

Complete linkage

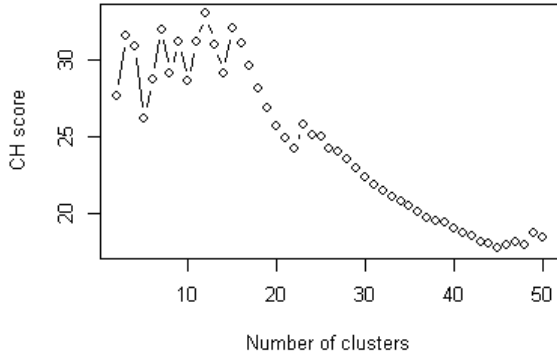

Average linkage

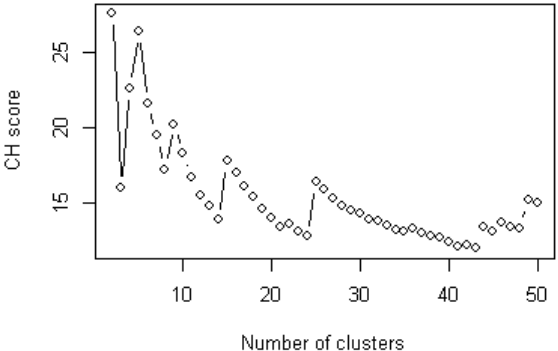

Single linkage

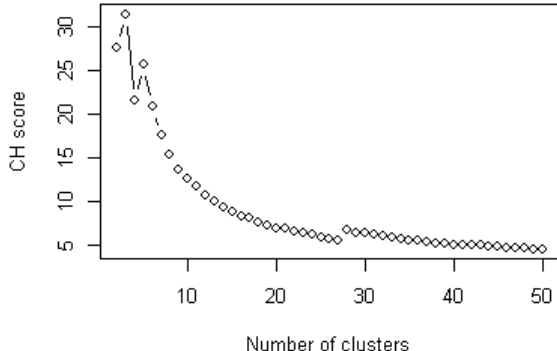



Supplementary Figure 6. Scree plot showing the proportion of variance explained by each principal component, following principal components analysis applied to the longitudinal dataset of phenotypic characteristics.

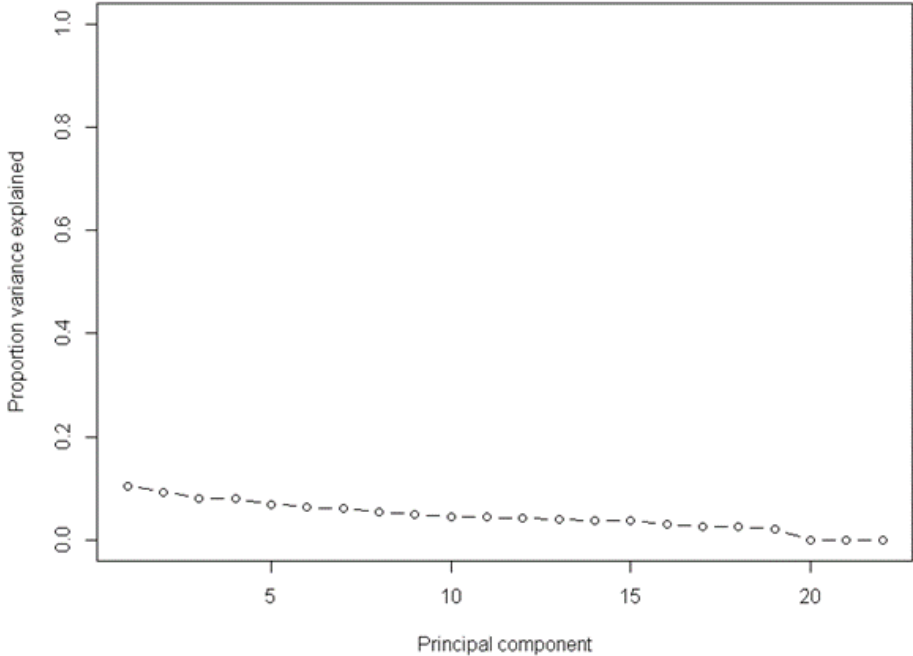

Supplementary Figure 7. Plot showing the proportion of the unexplained sums of squares according to cluster number, following k-means cluster analysis applied to the longitudinal dataset of phenotypic characteristics.

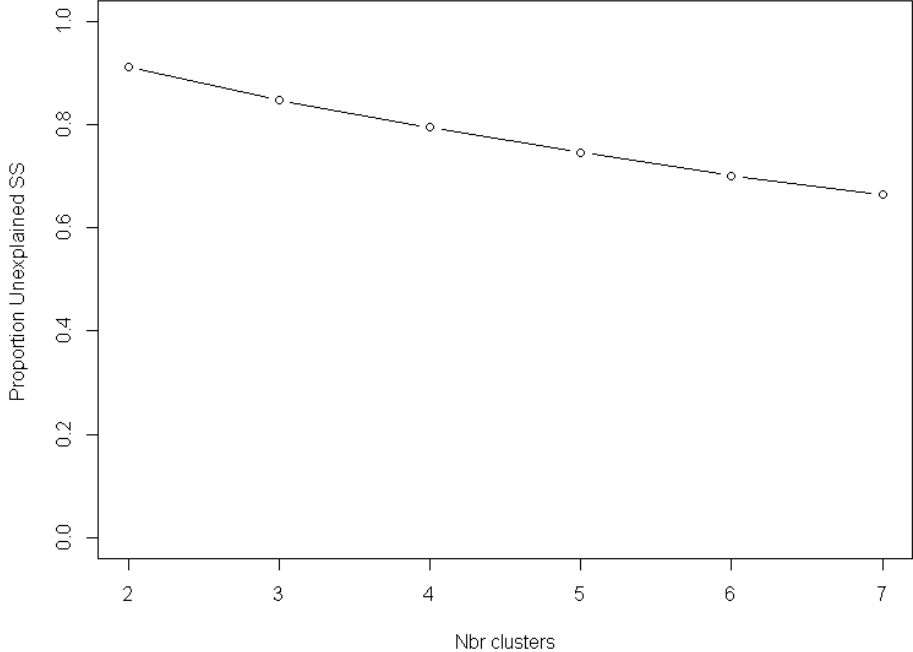

Supplementary Figure 8. Plot showing the Calinski-Harabasz scores according to cluster number, following k-means cluster analysis applied to the longitudinal dataset of phenotypic characteristics.

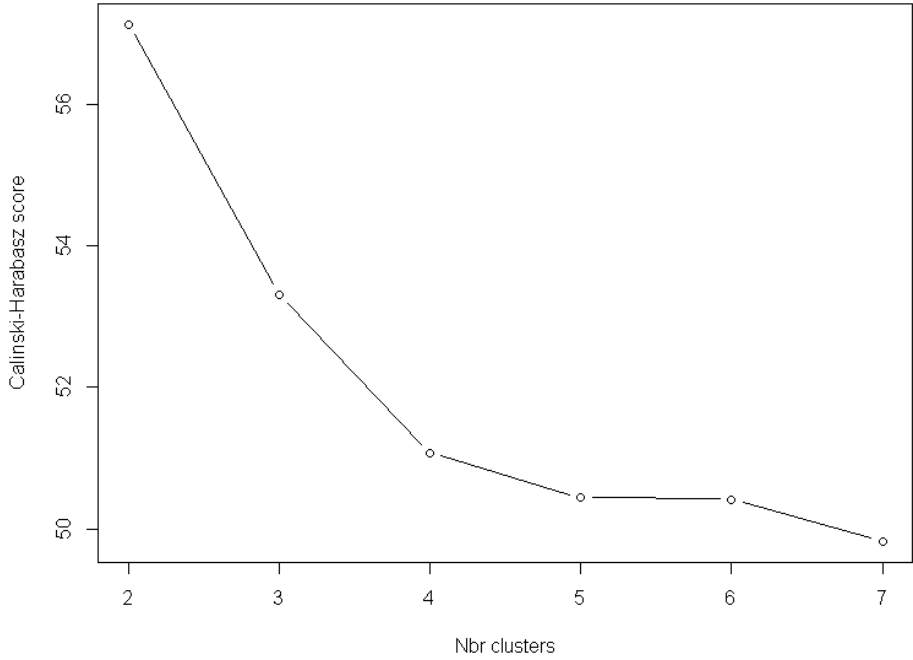

Supplementary Figure 9. Dendrograms following agglomerative hierarchical cluster analysis applied to the longitudinal dataset of phenotypic characteristics, according to linkage type. Dissimilarity is plotted on the y-axis and each participant is shown on the x-axis. Each horizontal line represents the fusion of a pair of clusters, with the height of the segment showing the dissimilarity between the members of the pair. Clusters that fuse near the bottom of the tree are more similar, while clusters that fuse near the top are less similar.

Single linkage (cophenetic correlation coefficient 0.82)

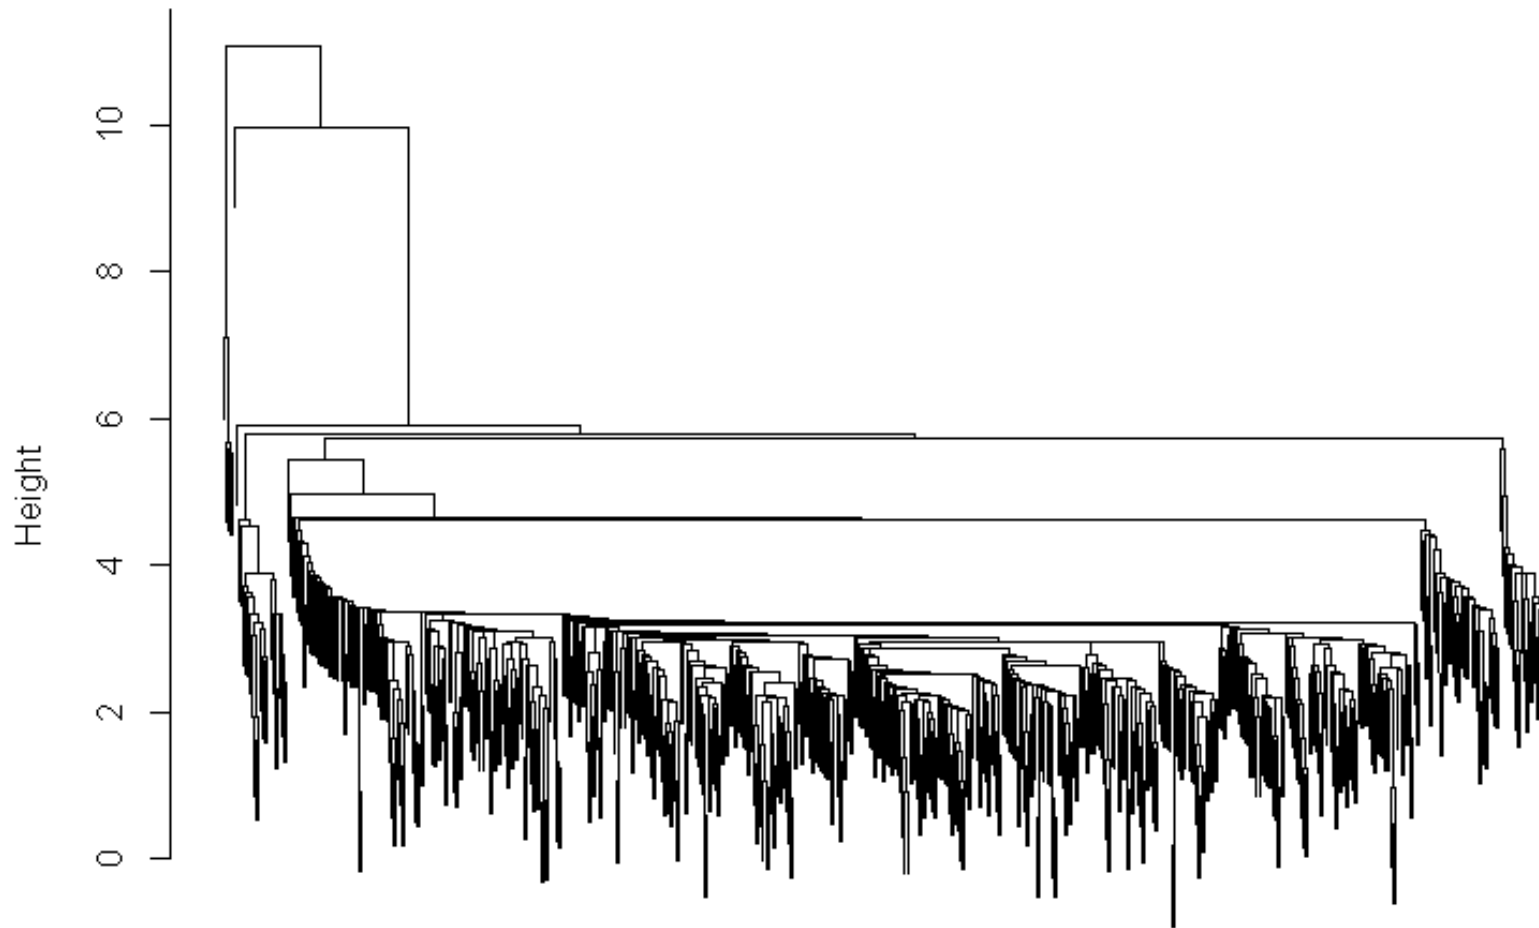

Average linkage (cophenetic correlation coefficient 0.88)

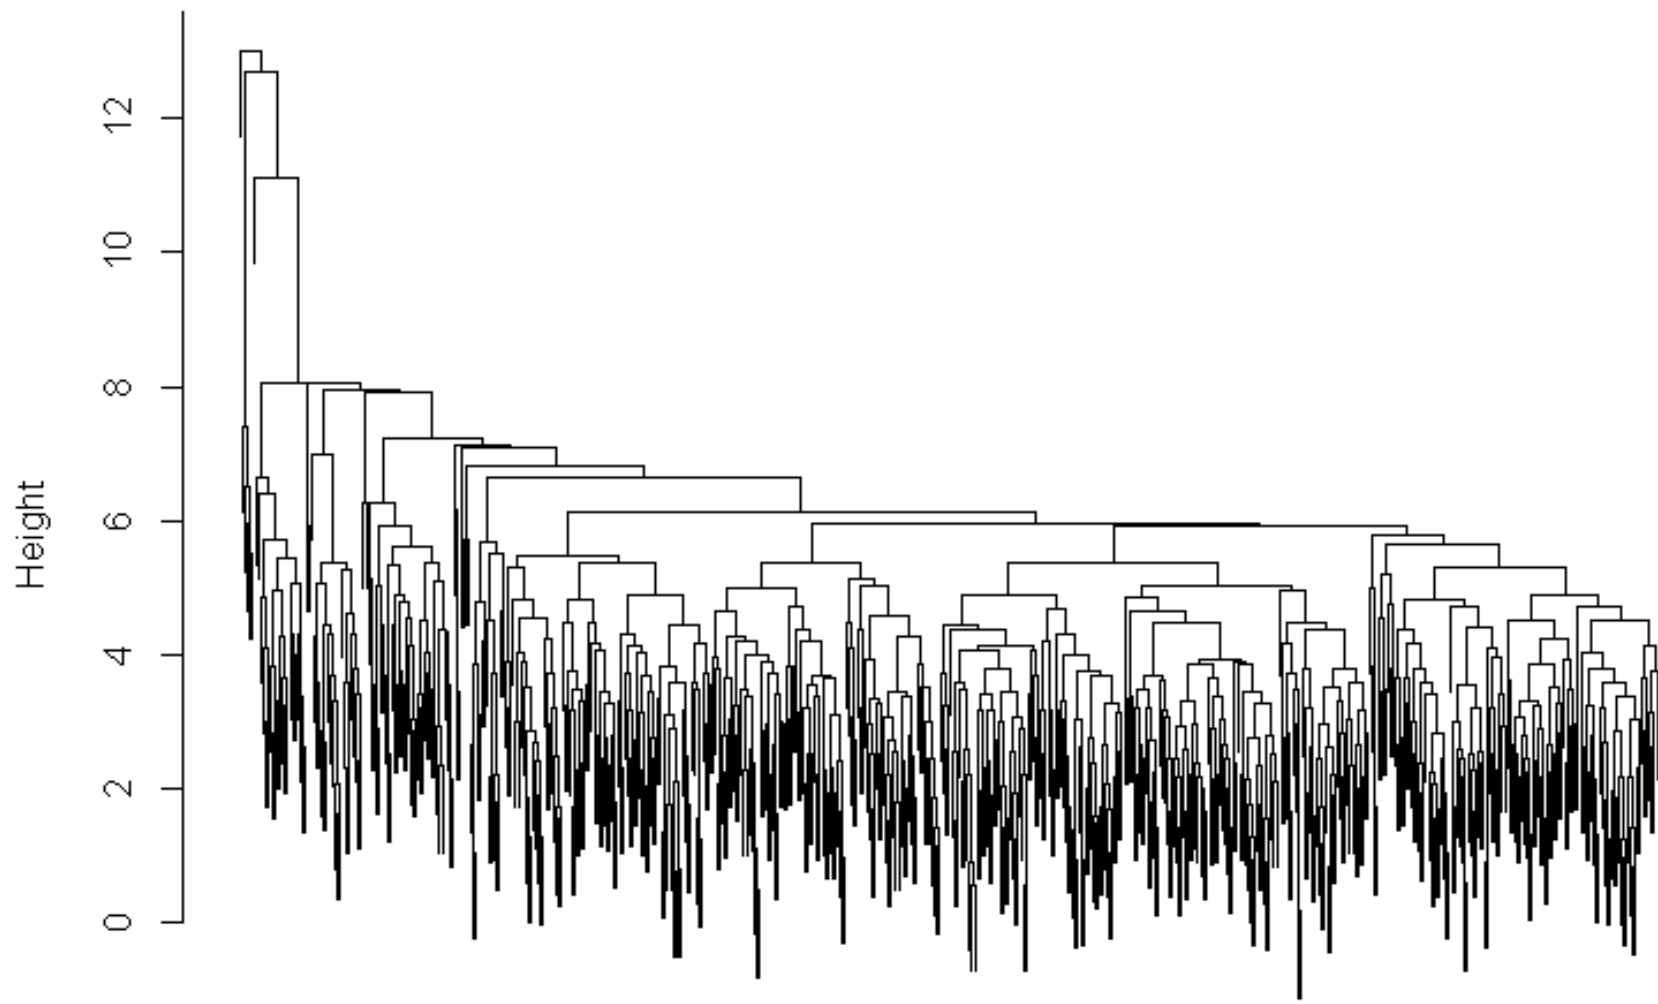

Complete linkage (cophenetic correlation coefficient 0.73)

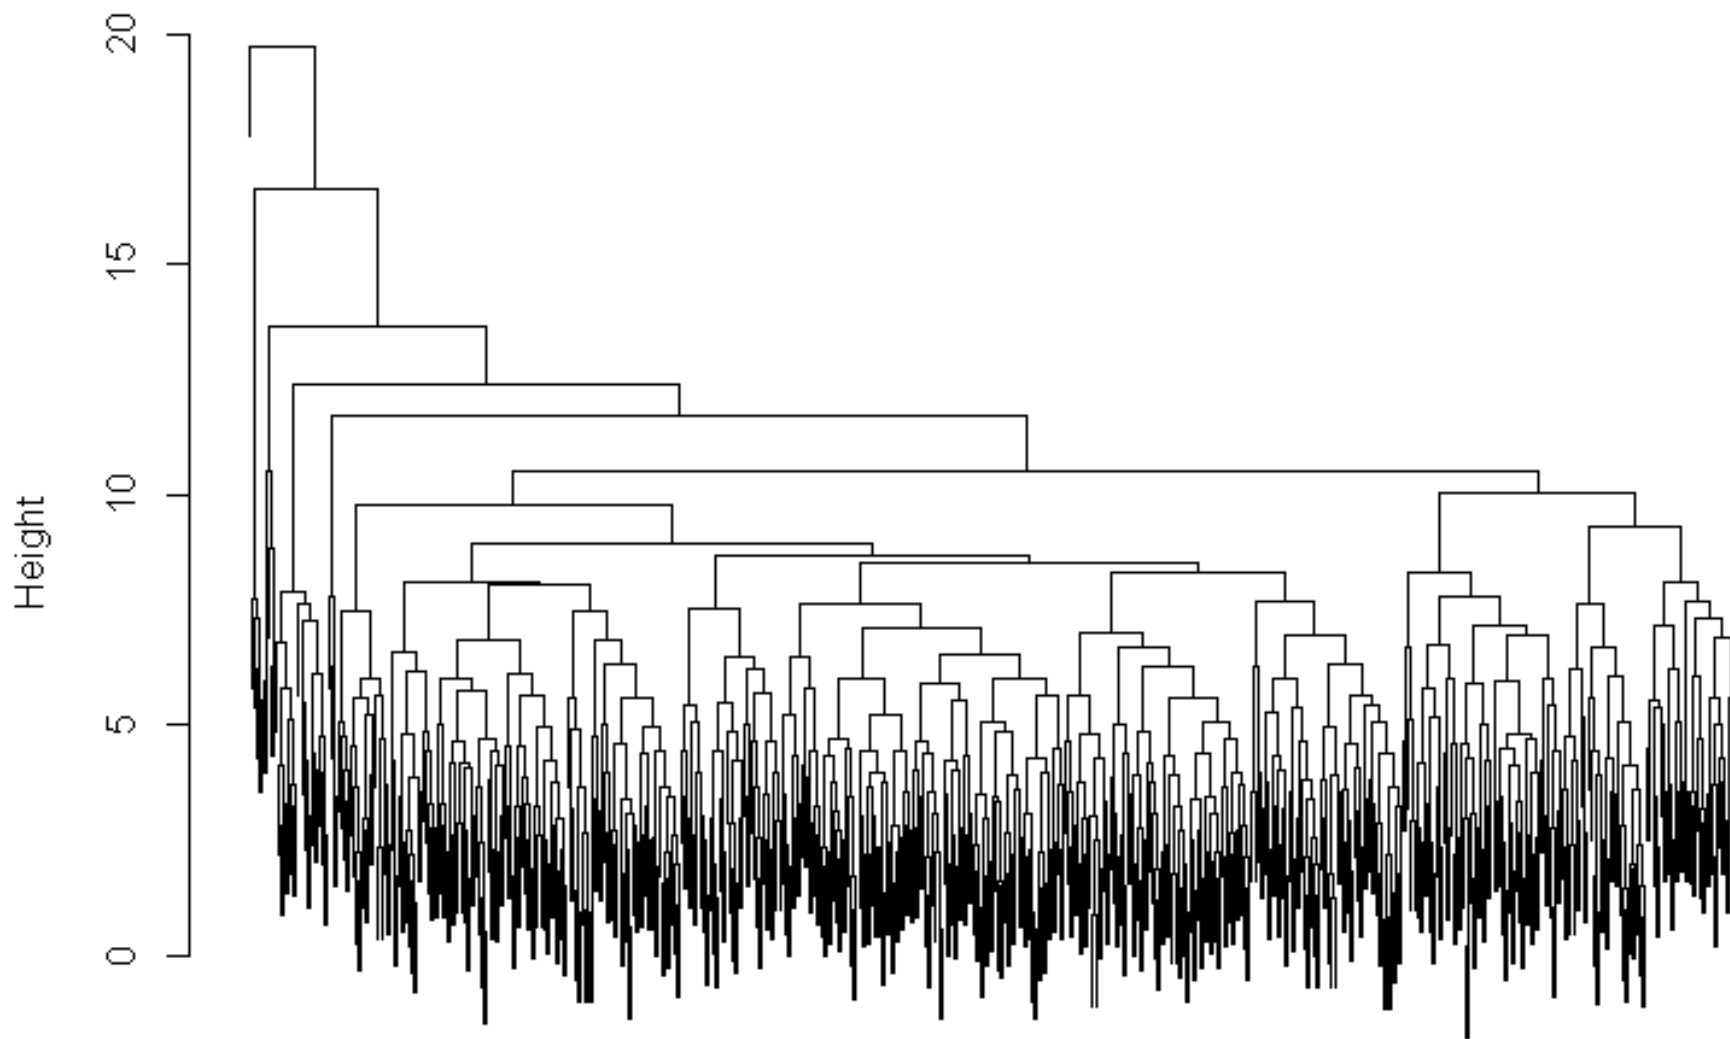

Supplementary Figure 10. Plot showing the Calinski-Harabasz scores according to cluster number, following agglomerative hierarchical cluster analysis applied to the longitudinal dataset of phenotypic characteristics, according to linkage type.

Complete linkage

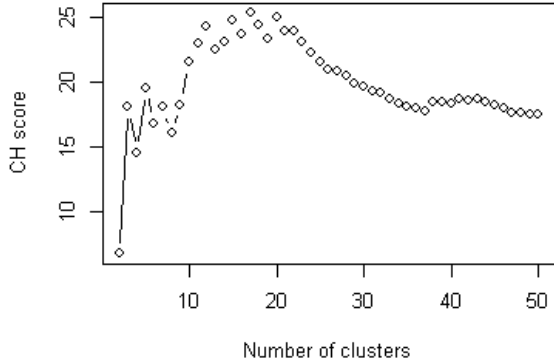

Average linkage

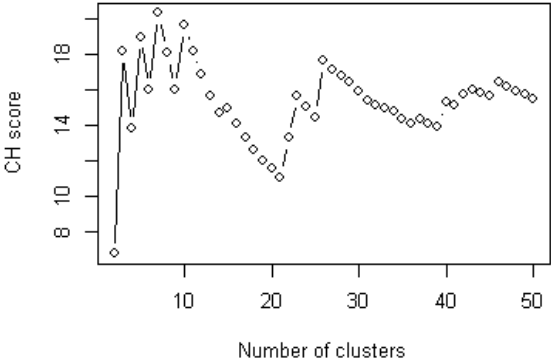

Single linkage

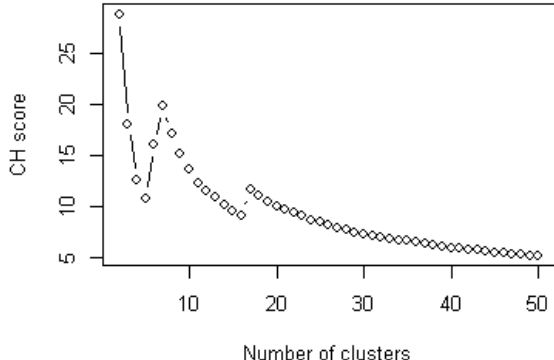

Supplementary Figure 11. CART classification trees and related confusion matrices and performance metrics for the clusters identified by phenotypic characteristics, based on CART classification by the same phenotypic characteristics.

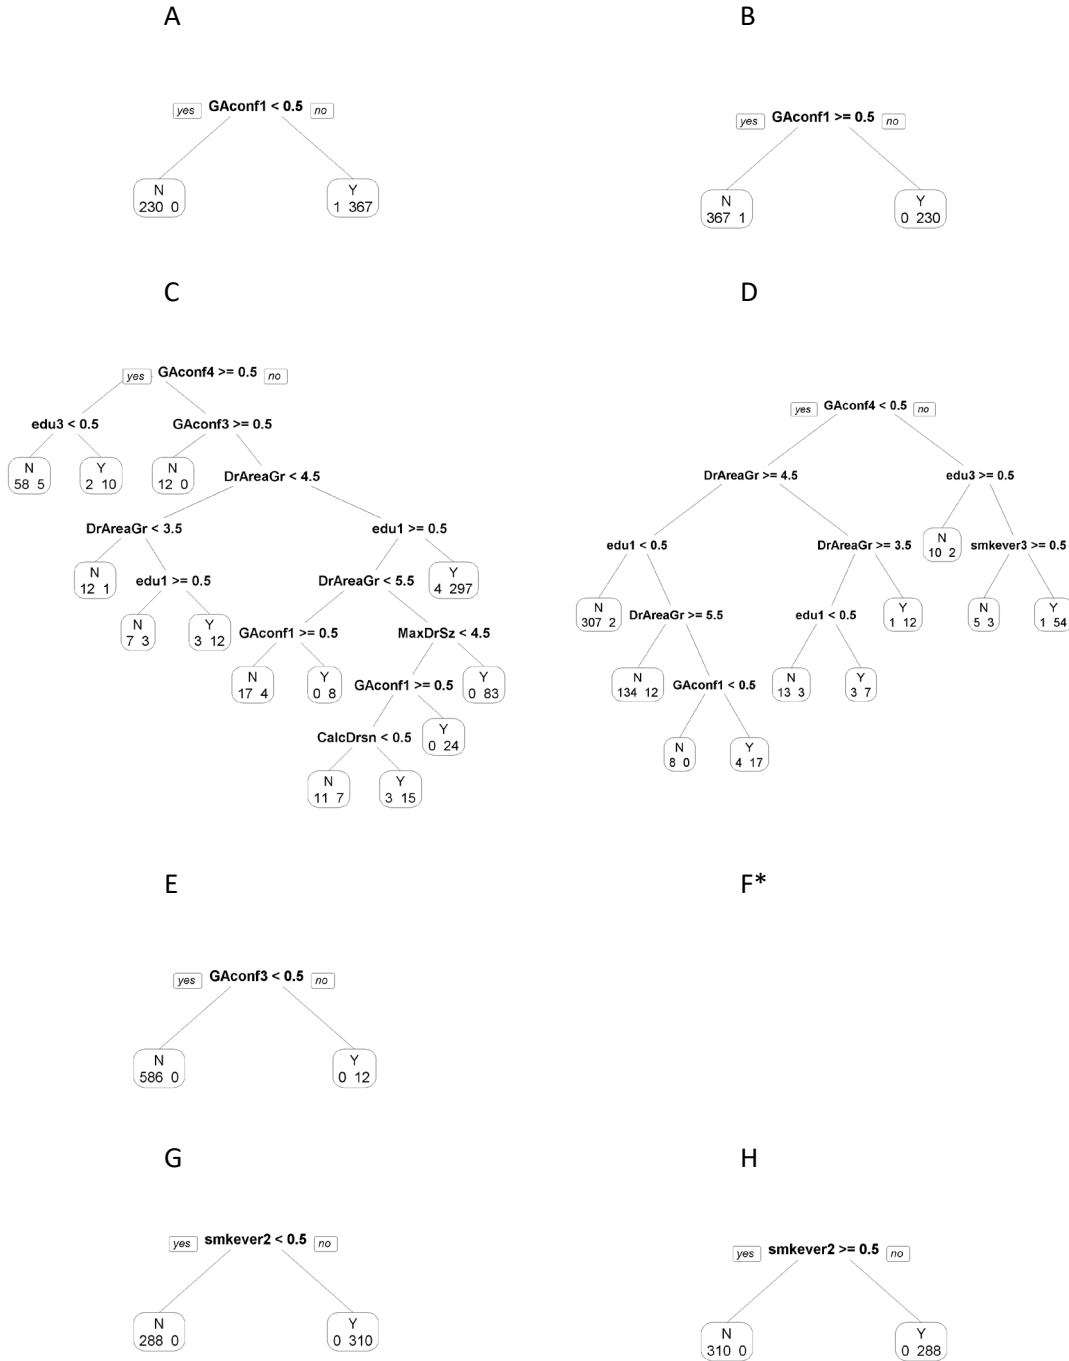

\* Classification by CART was not possible for cluster F, owing to very small numbers (n=5).



|                        |                        |                        |
|------------------------|------------------------|------------------------|
| Cluster A              | Cluster B              | Cluster C              |
| Confusion matrix       | Confusion matrix       | Confusion matrix       |
| predicted N Y          | predicted N Y          | predicted N Y          |
| N 230 0                | N 367 1                | N 117 20               |
| Y 1 367                | Y 0 230                | Y 12 449               |
| Accuracy = 0.998328    | Accuracy = 0.998328    | Accuracy = 0.946488    |
| Sensitivity = 1.000000 | Sensitivity = 0.995671 | Sensitivity = 0.957356 |
| Specificity = 0.995671 | Specificity = 1.000000 | Specificity = 0.906977 |
| -----                  |                        |                        |
| Cluster D              | Cluster E              |                        |
| Confusion matrix       | Confusion matrix       |                        |
| predicted N Y          | predicted N Y          |                        |
| N 477 22               | N 586 0                |                        |
| Y 9 90                 | Y 0 12                 |                        |
| Accuracy = 0.948161    | Accuracy = 1.000000    |                        |
| Sensitivity = 0.803571 | Sensitivity = 1.000000 |                        |
| Specificity = 0.981481 | Specificity = 1.000000 |                        |
| -----                  |                        |                        |
| Cluster G              | Cluster H              |                        |
| Confusion matrix       | Confusion matrix       |                        |
| predicted N Y          | predicted N Y          |                        |
| N 597 1                | N 584 0                |                        |
| Y 0 0                  | Y 0 14                 |                        |
| Accuracy = 0.998328    | Accuracy = 1.000000    |                        |
| Sensitivity = 0.000000 | Sensitivity = 1.000000 |                        |
| Specificity = 1.000000 | Specificity = 1.000000 |                        |

Supplementary Figure 12. Results of logistic regression with LASSO, with related confusion matrices and performance metrics, for the clusters identified by phenotypic characteristics, based on logistic regression according to the same phenotypic characteristics.

Log odds ratio estimates

| NAME      | A    | B     | C     | D     | E    |
|-----------|------|-------|-------|-------|------|
| DrAreaGrd | .    | .     | 0.34  | -0.51 | .    |
| MaxDrSz   | .    | .     | 0.17  | -0.27 | .    |
| edu1      | .    | .     | -0.08 | 0.44  | .    |
| edu3      | .    | .     | .     | -0.04 | .    |
| GAconf1   | 1.02 | -1.02 | .     | .     | .    |
| GAconf3   | .    | .     | -1.82 | .     | 5.04 |
| GAconf4   | .    | .     | -2.19 | 2.70  | .    |
| GAconf5   | .    | .     | .     | .     | .    |

Variables never selected: white, age, male, GAconf2, GASqr, GARate, CGA, CalcDrsn, GA\_FE, RPDprob, VA, edu2, smkever1, smkever2, and smkever3.

\* Logistic regression not possible for cluster F, owing to very small numbers (n=5).

| Name     | G    | H     |
|----------|------|-------|
| GAconf3  | .    | .     |
| smkever2 | 0.36 | -0.36 |

Variables never selected: age, male, white, GARate, CGA, CalcDrsn, DrAreaGrd, MaxDrSz, GA\_FE, RPDprob, VARate, edu1, edu2, edu3, GAconf1, GAconf2, GAconf4, GAconf5, smkever1, and smkever3.

|                                                                                                                                                        |                                                                                                                                                        |                                                                                                                                                    |
|--------------------------------------------------------------------------------------------------------------------------------------------------------|--------------------------------------------------------------------------------------------------------------------------------------------------------|----------------------------------------------------------------------------------------------------------------------------------------------------|
| <b>Cluster A</b><br>Confusion matrix<br>pred N Y<br>N 230 0<br>Y 1 367<br>Accuracy = 0.998328<br>Sensitivity = 1.000000<br>Specificity = 0.995671      | <b>Cluster B</b><br>Confusion matrix<br>pred N Y<br>N 367 1<br>Y 0 230<br>Accuracy = 0.998328<br>Sensitivity = 0.995671<br>Specificity = 1.000000      | <b>Cluster C</b><br>Confusion matrix<br>pred N Y<br>N 57 11<br>Y 72 458<br>Accuracy = 0.861204<br>Sensitivity = 0.976546<br>Specificity = 0.441860 |
| <b>Cluster D</b><br>Confusion matrix<br>pred N Y<br>N 474 57<br>Y 12 55<br>Accuracy = 0.884615<br>Sensitivity = 0.491071<br>Specificity = 0.975309     | <b>Cluster E</b><br>Confusion matrix<br>pred N Y<br>N 586 0<br>Y 0 12<br>Accuracy = 1.000000<br>Sensitivity = 1.000000<br>Specificity = 1.000000       |                                                                                                                                                    |
| <b>Cluster G</b><br>Confusion matrix<br>Y<br>pred N Y<br>N 288 0<br>Y 0 310<br>Accuracy = 1.000000<br>Sensitivity = 1.000000<br>Specificity = 1.000000 | <b>Cluster H</b><br>Confusion matrix<br>Y<br>pred N Y<br>N 310 0<br>Y 0 288<br>Accuracy = 1.000000<br>Sensitivity = 1.000000<br>Specificity = 1.000000 |                                                                                                                                                    |

Supplementary Figure 13. Cohen's effect sizes for the clusters identified by phenotypic characteristics, based on effect sizes for the same phenotypic characteristics.

Cluster A

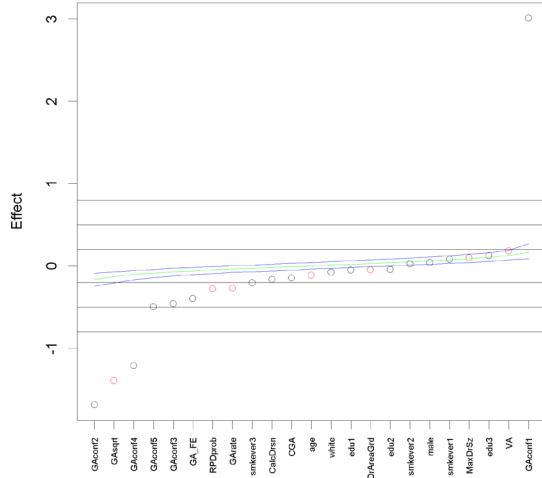

Cluster B

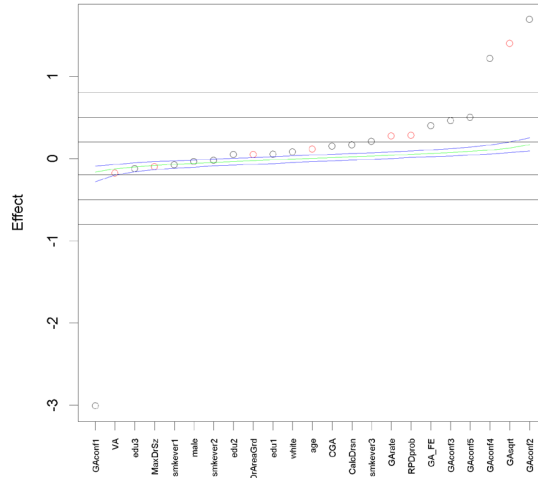

Cluster C

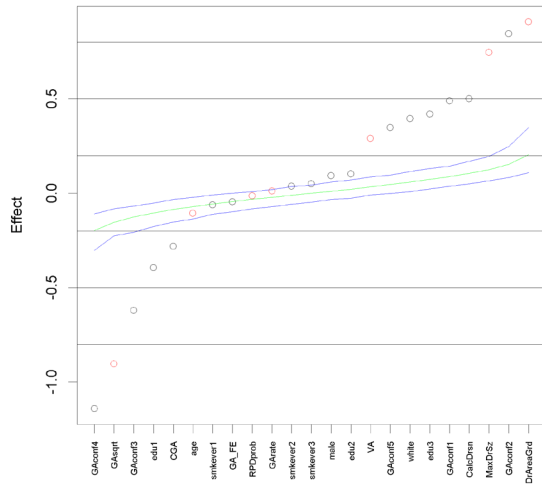

Cluster D

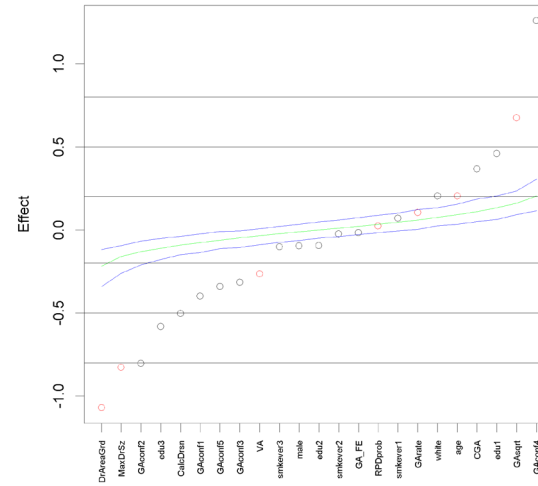

Cluster E

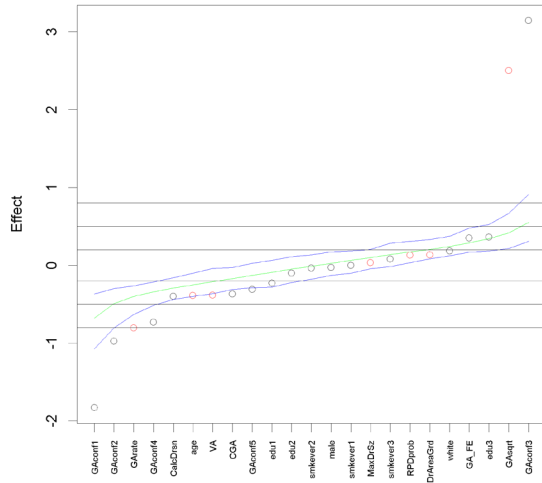

Cluster F

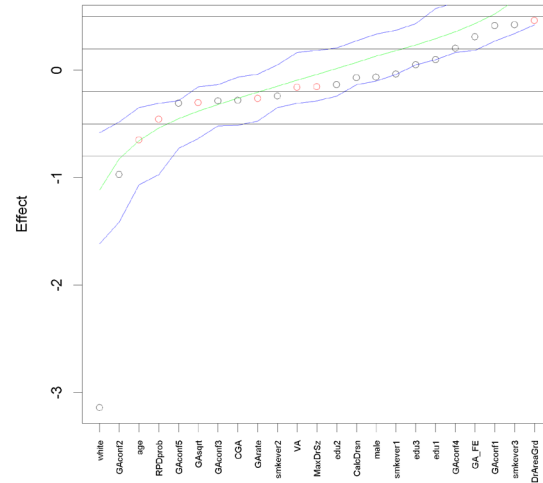

Cluster G

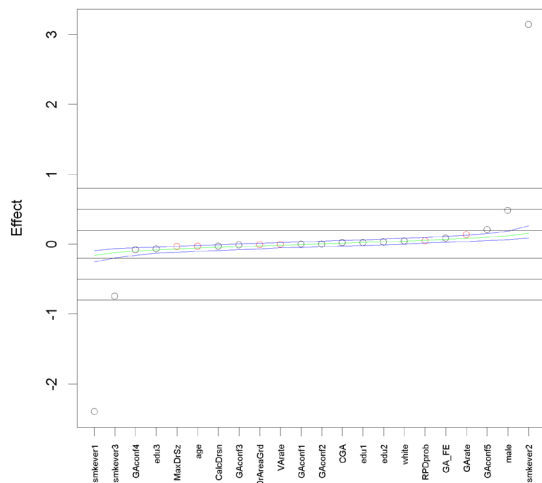

Cluster H

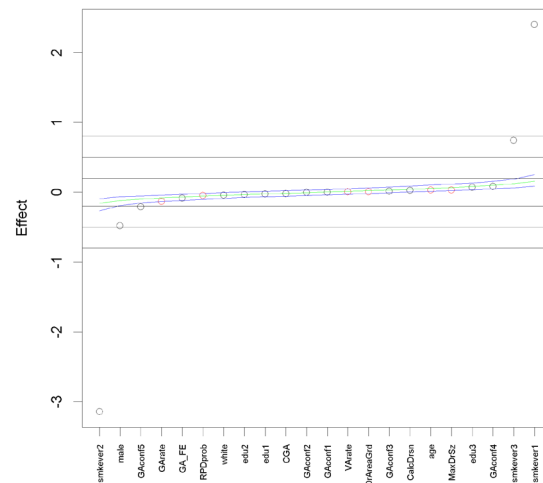

The effect sizes are plotted in ascending order on the y axis. Horizontal reference lines mark effect sizes for  $\pm 0.2$ ,  $\pm 0.5$ , and  $\pm 0.8$ . Points are colored red or black according to whether they are for Cohen's d (continuous features) or Cohen's h (binary features). The green and blue curves are expected values and 95% confidence intervals from a simulation of 1000 iterations under the null hypothesis that the cluster is unrelated to the features.

Supplementary Figure 14. CART classification trees and related confusion matrices and performance metrics for the clusters identified by phenotypic characteristics, based on CART classification by the genetic characteristics.

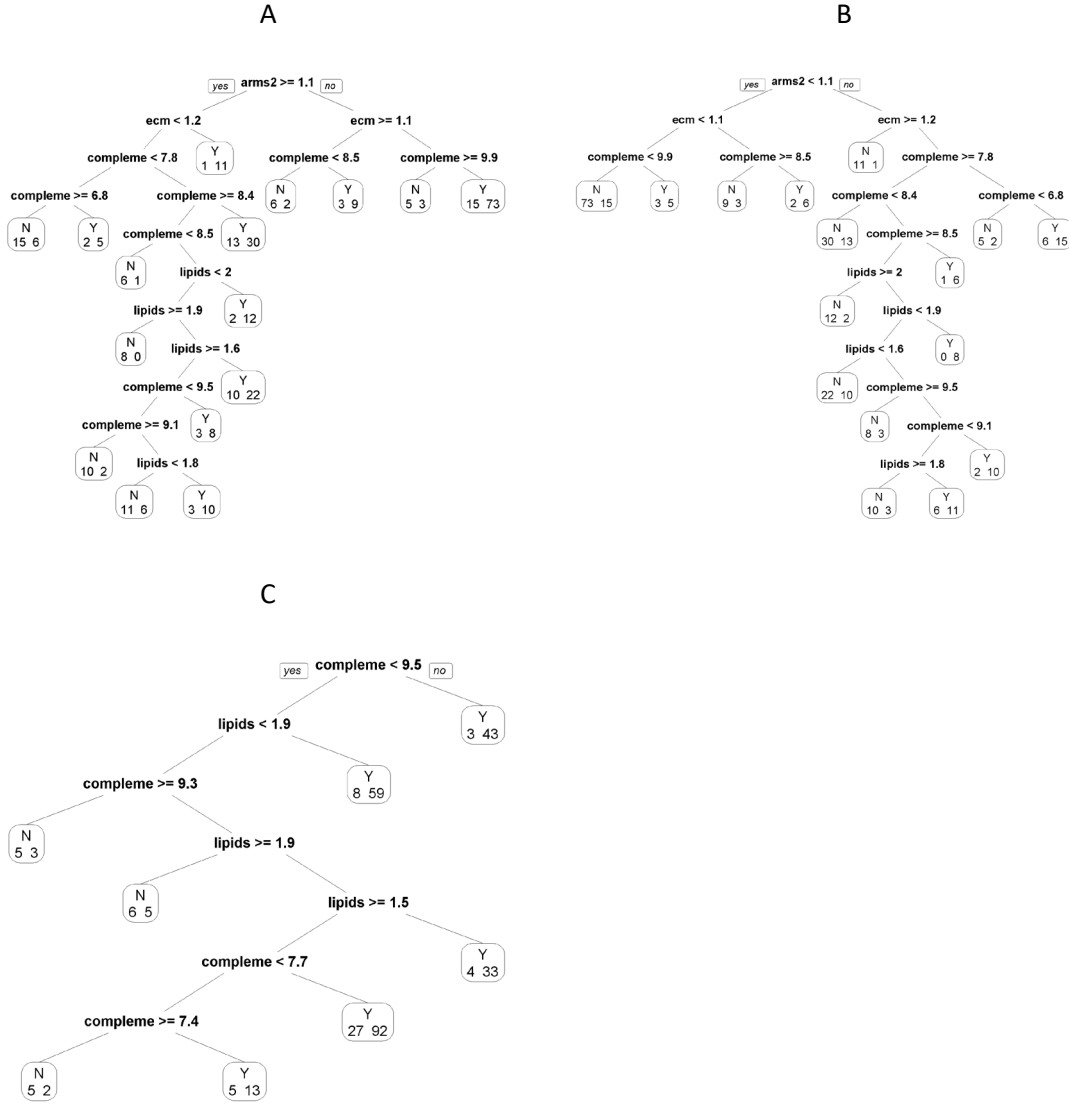

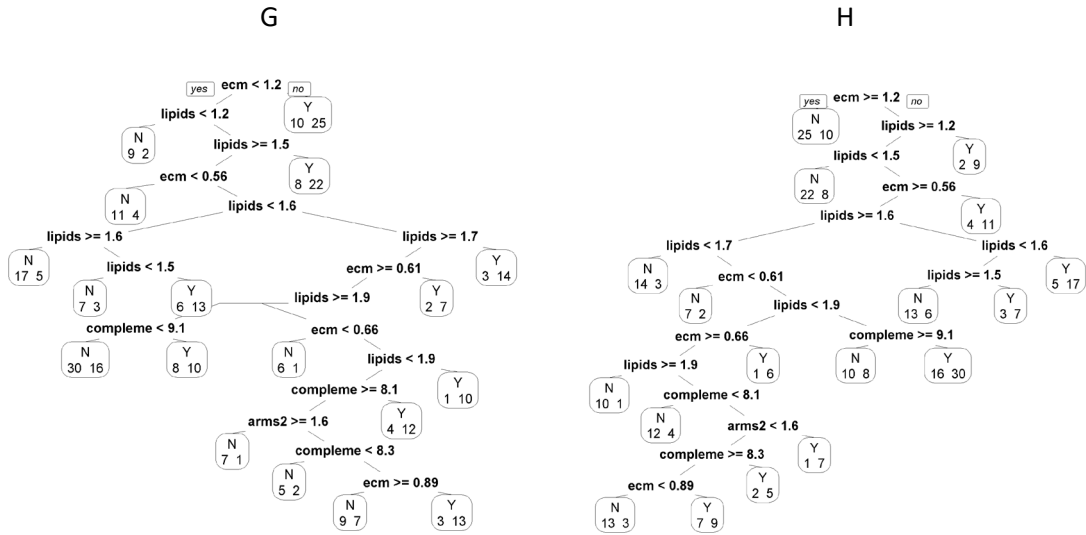

\* Meaningful classification by CART was not possible for clusters D-F, owing to small numbers.

| Summary statistics for cluster A | Summary statistics for cluster B | Summary statistics for cluster C |
|----------------------------------|----------------------------------|----------------------------------|
| Confusion matrix                 | Confusion matrix                 | Confusion matrix                 |
| Predicted N Y                    | Predicted N Y                    | Predicted N Y                    |
| N 61 20                          | N 180 52                         | N 16 10                          |
| Y 52 180                         | Y 20 61                          | Y 47 240                         |
| Accuracy = 0.769968              | Accuracy = 0.769968              | Accuracy = 0.817891              |
| Sensitivity = 0.900000           | Sensitivity = 0.539823           | Sensitivity = 0.960000           |
| Specificity = 0.539823           | Specificity = 0.900000           | Specificity = 0.253968           |

Summary statistics for cluster G  
 Confusion matrix  
 predicted N Y  
 N 101 41  
 Y 45 126  
 Accuracy = 0.725240  
 Sensitivity = 0.754491  
 Specificity = 0.691781

Supplementary Figure 15. Cohen's effect sizes for the clusters identified by phenotypic characteristics, based on effect sizes for the genetic characteristics.

Cluster A

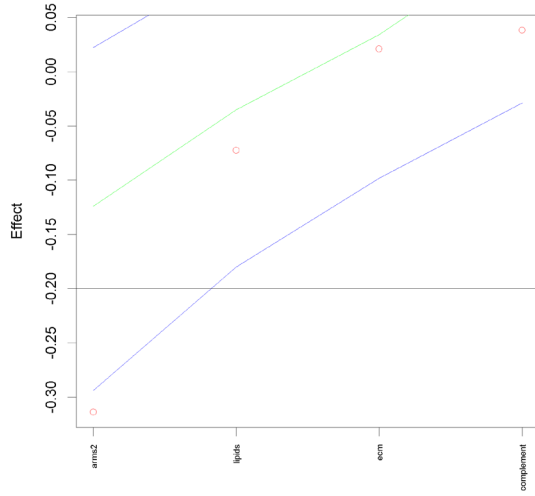

Cluster B

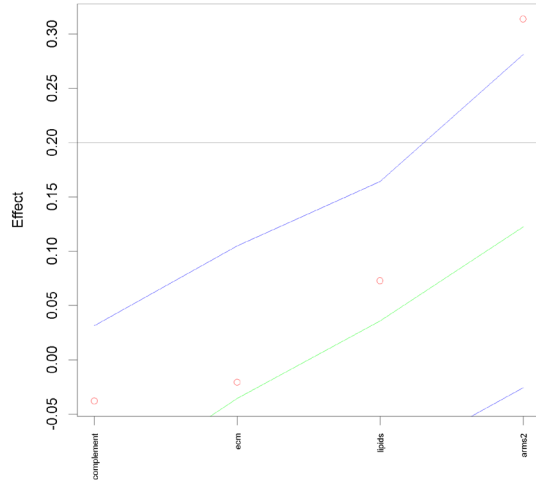

Cluster C

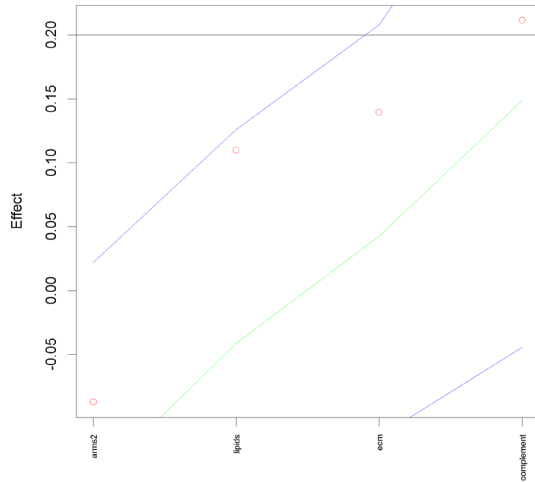

Cluster D

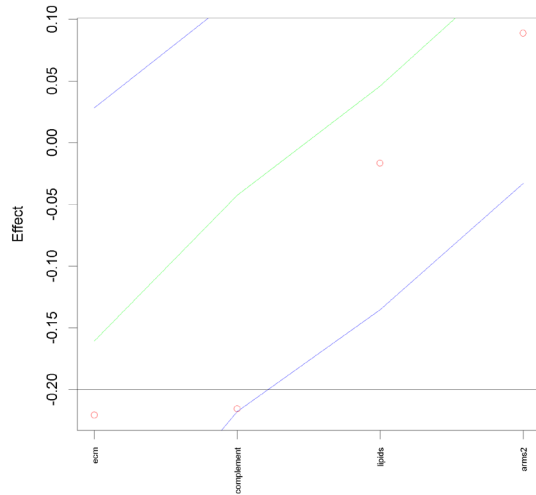

Cluster E

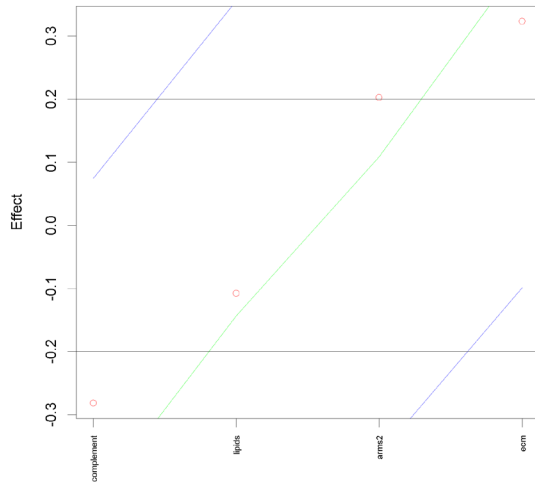

Cluster F

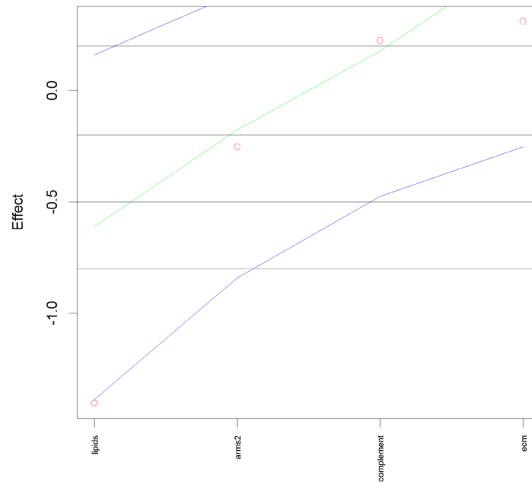

Cluster G

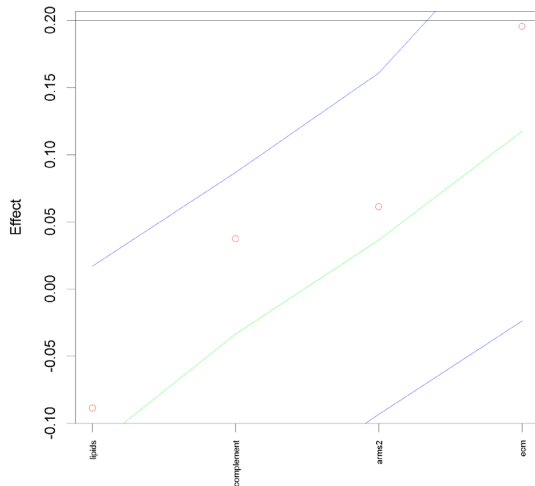

Cluster H

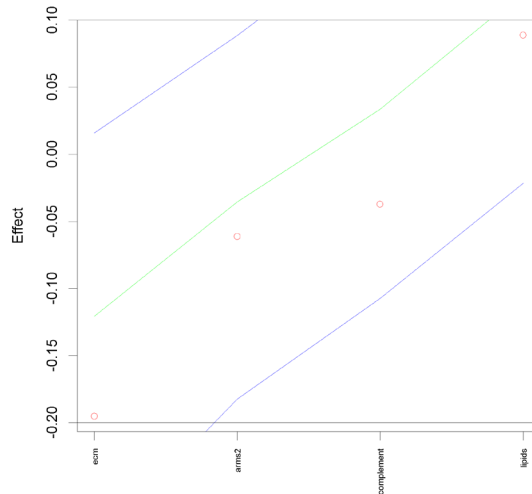

The effect sizes are plotted in ascending order on the y axis. Horizontal reference lines mark effect sizes for  $\pm 0.2$ ,  $\pm 0.5$ , and  $\pm 0.8$ . Points are colored red or black according to whether they are for Cohen's  $d$  (continuous features) or Cohen's  $h$  (binary features). The green and blue curves are expected values and 95% confidence intervals from a simulation of 1000 iterations under the null hypothesis that the cluster is unrelated to the features.

In all figures, the dots are mostly inside the blue intervals, suggesting that there is no strong evidence that the genetic variables are closely related to the phenotypic clusters.

Note: the logistic regression with LASSO either failed to converge or the predicted classification for every participant was either always inside (for clusters A, C, and G) or outside (for clusters B, D, and H). Essentially, the method failed to use the genetic data to classify the participants in a way similar to the clusters.



Supplementary Figure 16. Scree plot showing the proportion of variance explained by each principal component, following principal components analysis applied to the dataset of genetic characteristics.

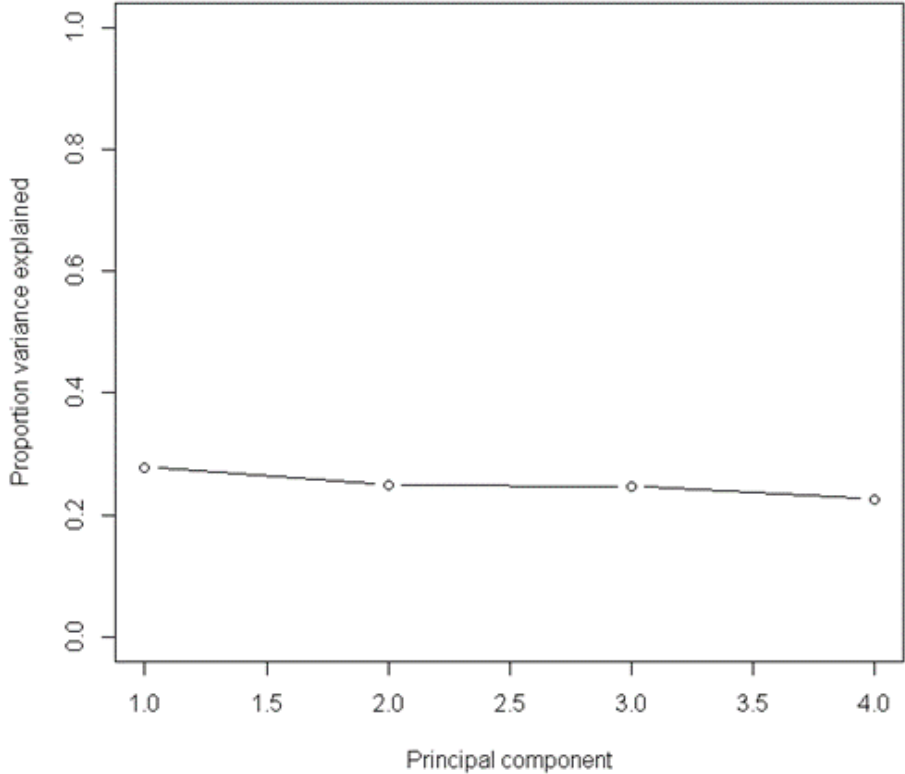

Supplementary Figure 17. Plot showing the proportion of the unexplained sums of squares according to cluster number, following k-means cluster analysis applied to the dataset of genetic characteristics.

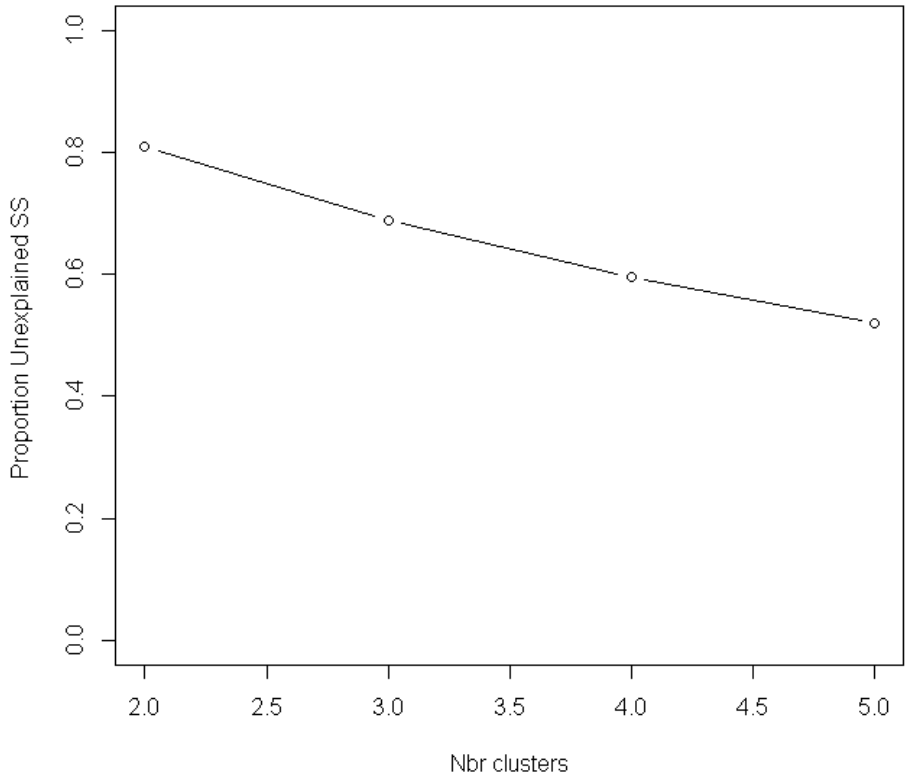

Supplementary Figure 18. Plot showing the Calinski-Harabasz scores according to cluster number, following k-means cluster analysis applied to the dataset of genetic characteristics.

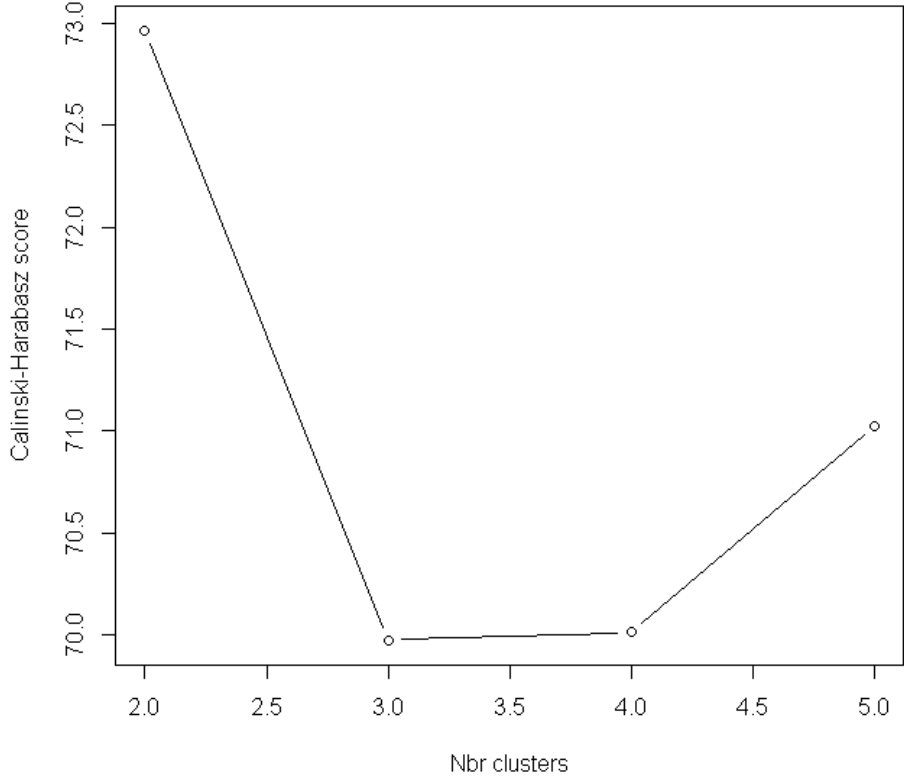

Supplementary Figure 19. Dendrograms following agglomerative hierarchical cluster analysis applied to the dataset of genetic characteristics, according to linkage type. Dissimilarity is plotted on the y-axis and each participant is shown on the x-axis. Each horizontal line represents the fusion of a pair of clusters, with the height of the segment showing the dissimilarity between the members of the pair. Clusters that fuse near the bottom of the tree are more similar, while clusters that fuse near the top are less similar.

Single linkage (cophenetic correlation coefficient 0.49)

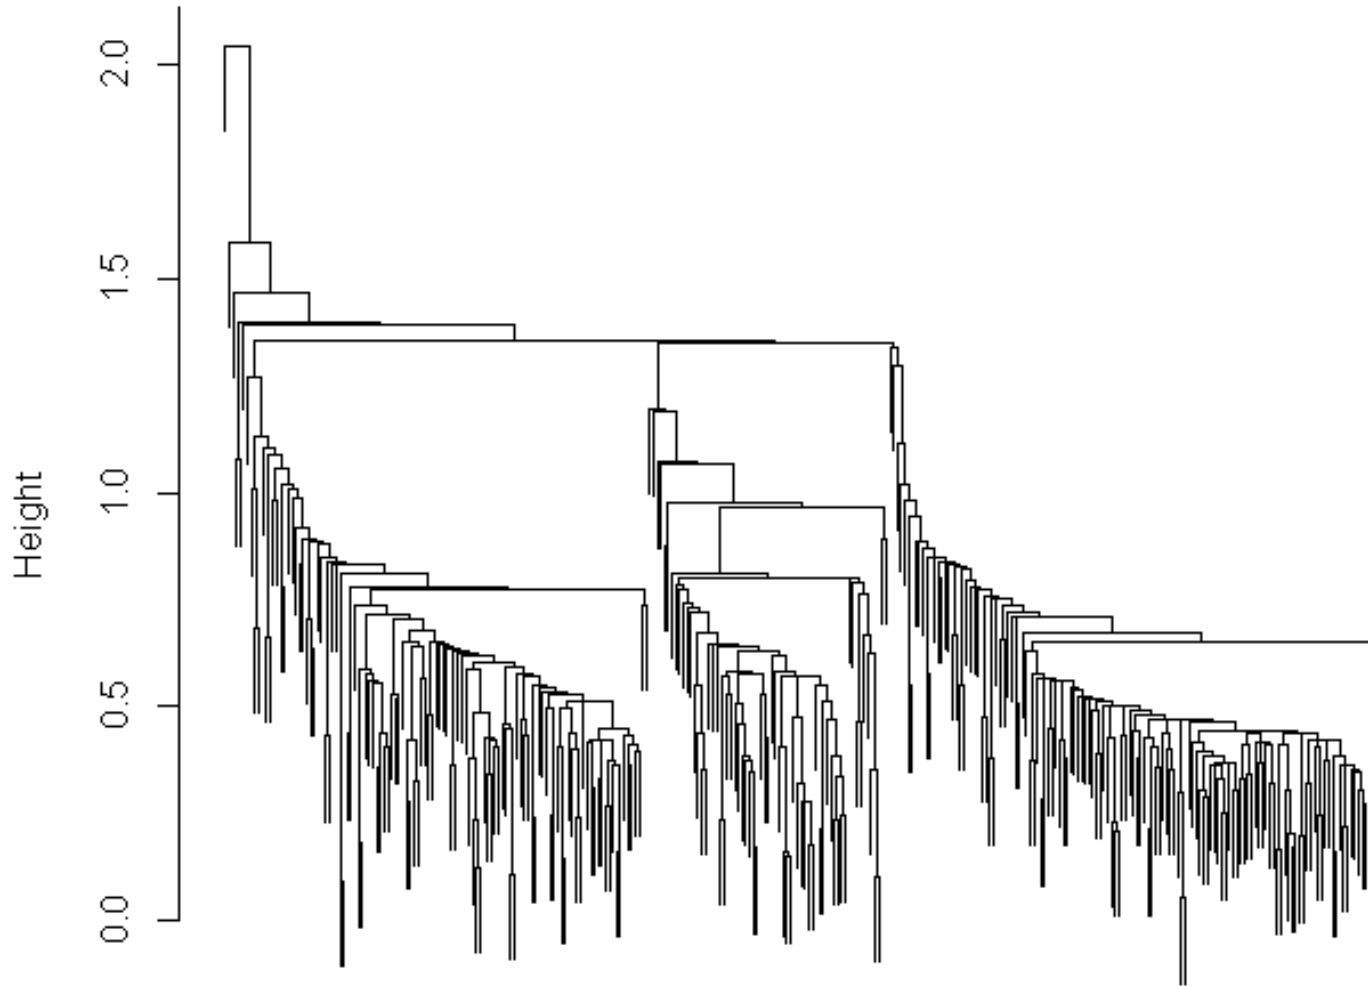

Average linkage (cophenetic correlation coefficient 0.62)

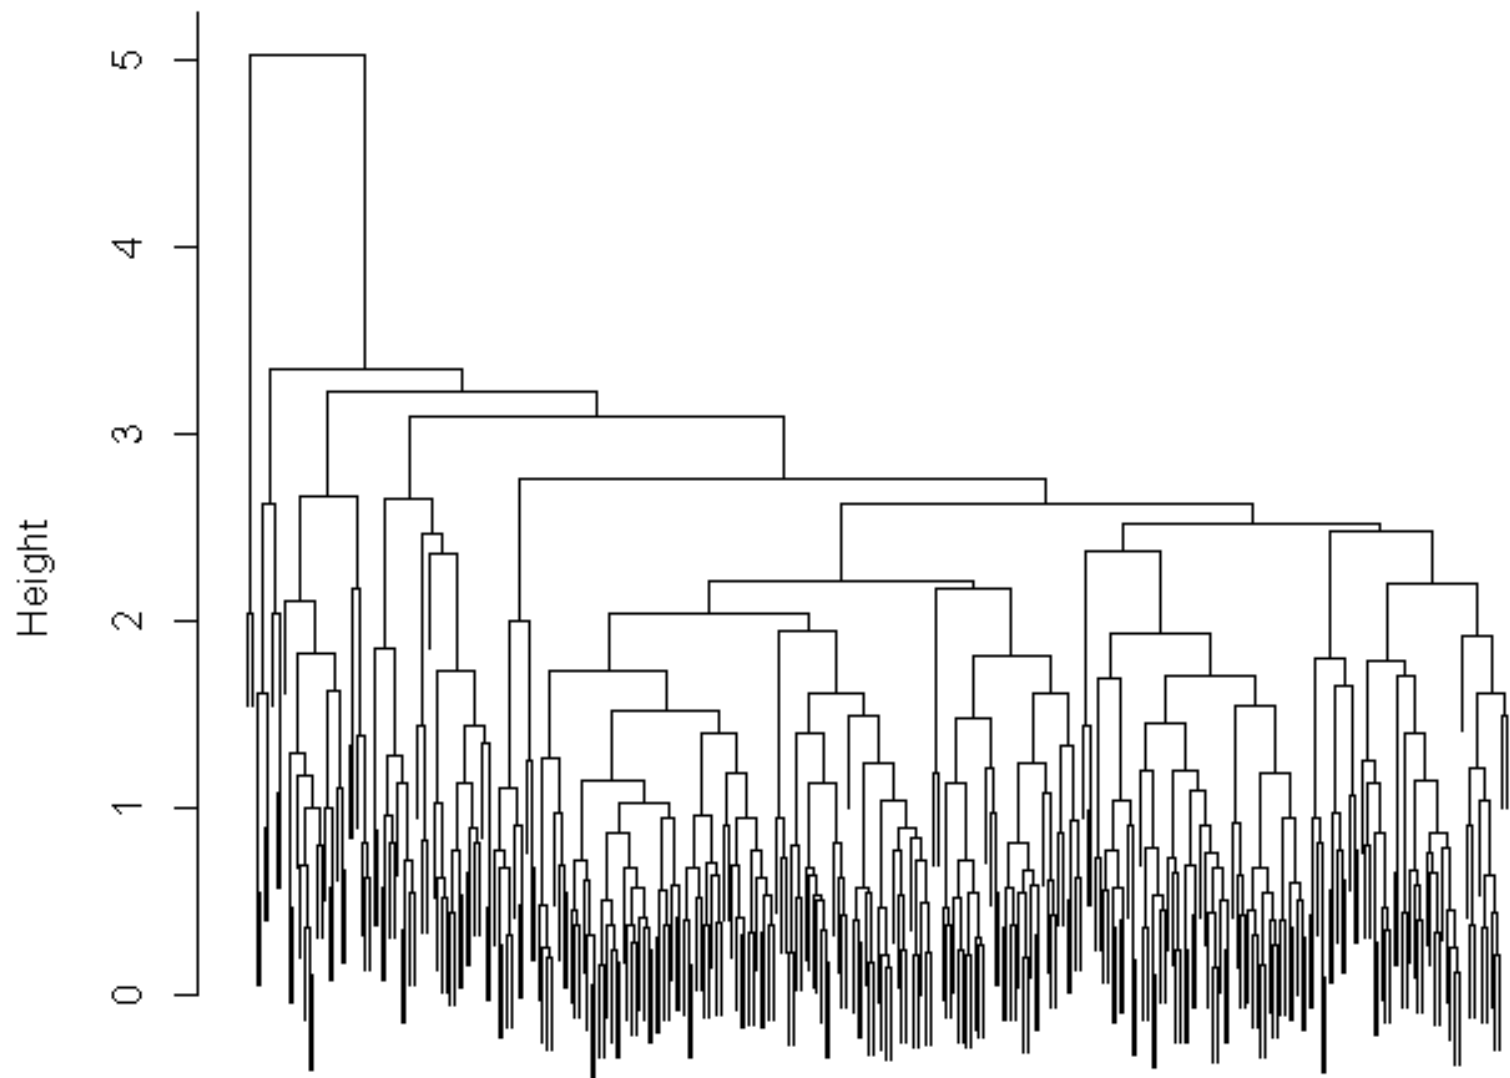

Complete linkage (cophenetic correlation coefficient 0.48)

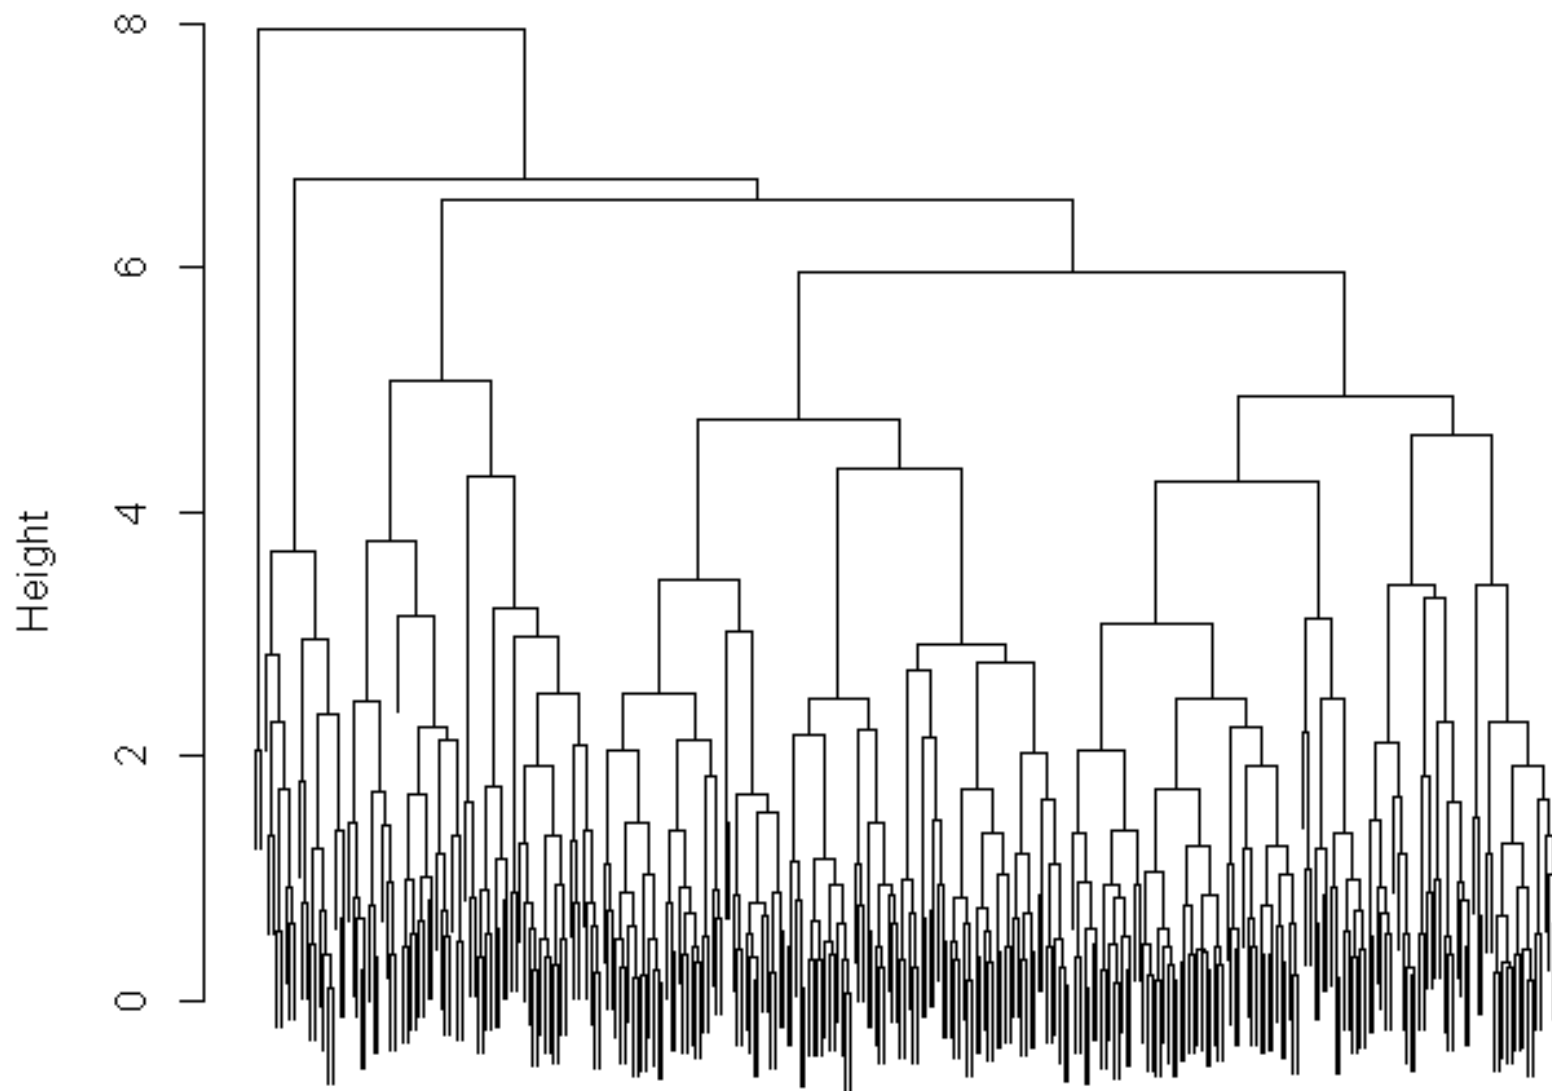

Supplementary Figure 20. Plot showing the Calinski-Harabasz scores according to cluster number, following agglomerative hierarchical cluster analysis applied to the dataset of genetic characteristics, according to linkage type.

Complete linkage

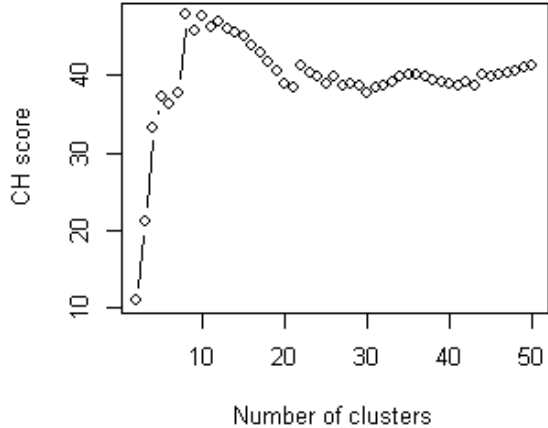

Average linkage

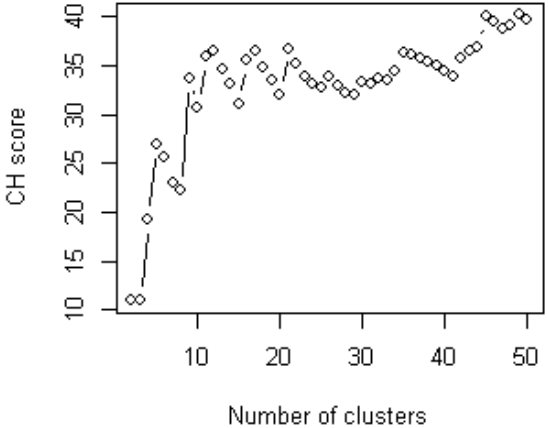

Single linkage

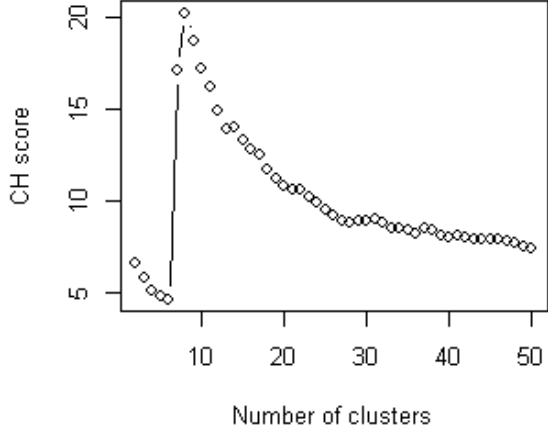

Supplementary Table 2. Demographic, phenotypic, and genetic characteristics of the genetic clusters.

| Variable                                        |                           | Cluster K<br>(N=106) | Cluster L<br>(N=135) | Cluster M<br>(N=19) | Cluster N<br>(N=11) | Cluster O<br>(N=11) | Cluster P<br>(N=16) | Cluster Q<br>(N=7) | Cluster R<br>(N=6) | Cluster S<br>(N=2) |
|-------------------------------------------------|---------------------------|----------------------|----------------------|---------------------|---------------------|---------------------|---------------------|--------------------|--------------------|--------------------|
| <b>Age (years): median (IQR)</b>                |                           | 75.1 (70.0, 79.3)    | 75.1 (69.3, 79.5)    | 73.8 (64.4, 77.4)   | 72.4 (71.4, 77.4)   | 77.5 (73.1, 80.0)   | 71.4 (65.3, 76.3)   | 66.5 (58.0, 77.3)  | 74.2 (70.6, 77.3)  | 67.0 (65.7, 68.2)  |
| <b>Male: n (%)</b>                              |                           | 50 (47.2)            | 49 (36.3)            | 10 (52.6)           | 4 (36.4)            | 3 (27.3)            | 6 (37.5)            | 1 (14.3)           | 2 (33.3)           | 1 (50.0)           |
| <b>White: n (%)</b>                             |                           | 106 (100.0)          | 135 (100.0)          | 16 (84.2)           | 11 (100.0)          | 11 (100.0)          | 16 (100.0)          | 7 (100.0)          | 6 (100.0)          | 2 (100.0)          |
| <b>Education: n (%)</b>                         | High School or Less       | 34 (32.1)            | 48 (35.6)            | 7 (36.8)            | 5 (45.5)            | 5 (45.5)            | 4 (25.0)            | 1 (14.3)           | 2 (33.3)           | 1 (50.0)           |
|                                                 | At least some College     | 54 (50.9)            | 63 (46.7)            | 8 (42.1)            | 3 (27.3)            | 6 (54.5)            | 9 (56.3)            | 2 (28.6)           | 2 (33.3)           | 1 (50.0)           |
|                                                 | Post-graduate             | 18 (17.0)            | 24 (17.8)            | 4 (21.1)            | 3 (27.3)            | 0 (0.0)             | 3 (18.8)            | 4 (57.1)           | 2 (33.3)           | 0 (0.0)            |
| <b>Smoking status: n (%)</b>                    | Current                   | 4 (3.8)              | 8 (5.9)              | 2 (10.5)            | 0 (0.0)             | 0 (0.0)             | 0 (0.0)             | 2 (28.6)           | 0 (0.0)            | 0 (0.0)            |
|                                                 | Former                    | 52 (49.1)            | 75 (55.6)            | 9 (47.4)            | 8 (72.7)            | 4 (36.4)            | 10 (62.5)           | 3 (42.9)           | 5 (83.3)           | 1 (50.0)           |
|                                                 | Never                     | 50 (47.2)            | 52 (38.5)            | 8 (42.1)            | 3 (27.3)            | 7 (63.6)            | 6 (37.5)            | 2 (28.6)           | 1 (16.7)           | 1 (50.0)           |
| <b>Central GA: n (%)</b>                        | Yes                       | 40 (37.7)            | 45 (33.3)            | 4 (21.1)            | 4 (36.4)            | 2 (18.2)            | 3 (18.8)            | 1 (14.3)           | 0 (0.0)            | 1 (50.0)           |
| <b>Calcified Drusen: n (%)</b>                  | Yes                       | 42 (39.6)            | 57 (42.2)            | 5 (26.3)            | 8 (72.7)            | 5 (45.5)            | 7 (43.8)            | 3 (42.9)           | 4 (66.7)           | 1 (50.0)           |
| <b>GA Configuration: n (%)</b>                  | Small (single patch <1DA) | 76 (71.7)            | 74 (54.8)            | 13 (68.4)           | 6 (54.5)            | 10 (90.9)           | 11 (68.8)           | 4 (57.1)           | 5 (83.3)           | 1 (50.0)           |
|                                                 | Multifocal                | 18 (17.0)            | 35 (25.9)            | 2 (10.5)            | 3 (27.3)            | 1 (9.1)             | 2 (12.5)            | 1 (14.3)           | 1 (16.7)           | 1 (50.0)           |
|                                                 | Horseshoe, Ring           | 1 (0.9)              | 4 (3.0)              | 1 (5.3)             | 0 (0.0)             | 0 (0.0)             | 0 (0.0)             | 0 (0.0)            | 0 (0.0)            | 0 (0.0)            |
|                                                 | Solid (center or not)     | 10 (9.4)             | 20 (14.8)            | 3 (15.8)            | 2 (18.2)            | 0 (0.0)             | 3 (18.8)            | 1 (14.3)           | 0 (0.0)            | 0 (0.0)            |
|                                                 | Indeterminate             | 1 (0.9)              | 2 (1.5)              | 0 (0.0)             | 0 (0.0)             | 0 (0.0)             | 0 (0.0)             | 1 (14.3)           | 0 (0.0)            | 0 (0.0)            |
| <b>Drusen Area Within the ETDRS Grid: n (%)</b> | Definite, < circle C1     | 1 (0.9)              | 0 (0.0)              | 0 (0.0)             | 0 (0.0)             | 0 (0.0)             | 0 (0.0)             | 0 (0.0)            | 0 (0.0)            | 0 (0.0)            |
|                                                 | Definite, < circle C2     | 2 (1.9)              | 0 (0.0)              | 0 (0.0)             | 0 (0.0)             | 0 (0.0)             | 0 (0.0)             | 0 (0.0)            | 0 (0.0)            | 0 (0.0)            |
|                                                 | Definite, < circle I2     | 0 (0.0)              | 3 (2.2)              | 0 (0.0)             | 0 (0.0)             | 0 (0.0)             | 0 (0.0)             | 0 (0.0)            | 0 (0.0)            | 0 (0.0)            |
|                                                 | Definite, < circle O2     | 5 (4.7)              | 5 (3.7)              | 1 (5.3)             | 0 (0.0)             | 0 (0.0)             | 0 (0.0)             | 1 (14.3)           | 0 (0.0)            | 1 (50.0)           |
|                                                 | Definite, < 1/2 DA        | 25 (23.6)            | 22 (16.3)            | 3 (15.8)            | 2 (18.2)            | 3 (27.3)            | 3 (18.8)            | 2 (28.6)           | 0 (0.0)            | 0 (0.0)            |
|                                                 | Definite, < 1 DA          | 20 (18.9)            | 37 (27.4)            | 5 (26.3)            | 6 (54.5)            | 0 (0.0)             | 6 (37.5)            | 2 (28.6)           | 5 (83.3)           | 0 (0.0)            |



| Variable                                                                                |                                | Cluster K<br>(N=106) | Cluster L<br>(N=135) | Cluster M<br>(N=19) | Cluster N<br>(N=11) | Cluster O<br>(N=11) | Cluster P<br>(N=16) | Cluster Q<br>(N=7) | Cluster R<br>(N=6) | Cluster S<br>(N=2) |
|-----------------------------------------------------------------------------------------|--------------------------------|----------------------|----------------------|---------------------|---------------------|---------------------|---------------------|--------------------|--------------------|--------------------|
|                                                                                         | Definite, >= 1 DA              | 53 (50.0)            | 68 (50.4)            | 10 (52.6)           | 3 (27.3)            | 8 (72.7)            | 7 (43.8)            | 2 (28.6)           | 1 (16.7)           | 1 (50.0)           |
| <b>Maximum Drusen Size: n (%)</b>                                                       | Definite, <63 um (circle C0)   | 1 (0.9)              | 0 (0.0)              | 0 (0.0)             | 0 (0.0)             | 0 (0.0)             | 0 (0.0)             | 0 (0.0)            | 0 (0.0)            | 0 (0.0)            |
|                                                                                         | Definite, <125 um (circle C1)  | 3 (2.8)              | 1 (0.7)              | 0 (0.0)             | 0 (0.0)             | 0 (0.0)             | 0 (0.0)             | 1 (14.3)           | 0 (0.0)            | 0 (0.0)            |
|                                                                                         | Definite, <250 um (circle C2)  | 45 (42.5)            | 69 (51.1)            | 11 (57.9)           | 1 (9.1)             | 4 (36.4)            | 7 (43.8)            | 5 (71.4)           | 2 (33.3)           | 1 (50.0)           |
|                                                                                         | Definite, >=250 um (circle C2) | 57 (53.8)            | 65 (48.1)            | 8 (42.1)            | 10 (90.9)           | 7 (63.6)            | 9 (56.3)            | 1 (14.3)           | 4 (66.7)           | 1 (50.0)           |
| <b>GA in Fellow Eye: n (%)</b>                                                          |                                | 26 (24.5)            | 31 (23.0)            | 7 (36.8)            | 0 (0.0)             | 2 (18.2)            | 2 (12.5)            | 1 (14.3)           | 0 (0.0)            | 2 (100.0)          |
| <b>RPD score: median (IQR)</b>                                                          |                                | 0.28 (0.06, 0.69)    | 0.37 (0.13, 0.80)    | 0.19 (0.08, 0.66)   | 0.77 (0.04, 0.89)   | 0.28 (0.11, 0.85)   | 0.40 (0.14, 0.84)   | 0.22 (0.05, 0.43)  | 0.48 (0.12, 0.69)  | 0.22 (0.13, 0.31)  |
| <b>Square Root of GA area (mm): median (IQR)</b>                                        |                                | 0.8 (0.6, 1.2)       | 0.9 (0.6, 1.3)       | 0.7 (0.6, 1.3)      | 1.1 (0.9, 2.0)      | 0.8 (0.6, 1.1)      | 0.8 (0.6, 1.1)      | 1.3 (0.6, 1.8)     | 0.6 (0.6, 1.0)     | 1.1 (0.9, 1.3)     |
| <b>GA Enlargement from Regression of Square Root of GA area (mm/year): median (IQR)</b> |                                | 0.19 (0.08, 0.37)    | 0.33 (0.08, 0.55)    | 0.18 (0.11, 0.30)   | 0.33 (0.24, 0.51)   | 0.18 (0.10, 0.29)   | 0.13 (0.04, 0.22)   | 0.48 (0.36, 0.64)  | 0.05 (0.02, 0.59)  | 0.62 (0.21, 1.03)  |
| <b>Visual acuity (ETDRS letters): median (IQR)</b>                                      |                                | 76.0 (66.0, 83.0)    | 75.0 (64.0, 81.0)    | 74.0 (72.0, 87.0)   | 67.0 (48.0, 73.0)   | 71.0 (60.0, 85.0)   | 78.0 (72.0, 82.5)   | 75.0 (71.0, 84.0)  | 79.0 (77.0, 81.0)  | 80.5 (73.0, 88.0)  |
| <b>52 SNP-based Genetic Risk Score: median (IQR)</b>                                    |                                | 15.1 (14.3, 15.8)    | 16.0 (15.0, 16.6)    | 15.6 (14.3, 16.4)   | 16.4 (16.1, 16.8)   | 13.2 (12.2, 14.5)   | 17.1 (16.4, 17.3)   | 14.5 (13.8, 14.9)  | 15.5 (14.9, 16.1)  | 19.0 (18.8, 19.2)  |
| <b>Complement GRS: median (IQR)</b>                                                     |                                | 9.0 (8.3, 9.5)       | 8.5 (8.1, 9.0)       | 9.2 (8.7, 9.7)      | 8.7 (8.3, 9.3)      | 8.0 (6.8, 8.3)      | 8.7 (8.5, 9.2)      | 6.4 (6.3, 7.1)     | 8.5 (8.0, 8.8)     | 12.7 (12.0, 13.3)  |
| <b>Extracellular matrix GRS: median (IQR)</b>                                           |                                | 0.9 (0.8, 1.0)       | 0.8 (0.7, 0.9)       | 1.0 (0.9, 1.1)      | 0.8 (0.8, 0.9)      | 0.5 (0.5, 0.7)      | 1.2 (1.2, 1.3)      | 1.0 (0.9, 1.2)     | 1.5 (1.5, 1.6)     | 0.9 (0.8, 0.9)     |
| <b>Lipid metabolism GRS: median (IQR)</b>                                               |                                | 1.7 (1.5, 1.8)       | 1.8 (1.7, 1.9)       | 1.2 (1.1, 1.3)      | 1.3 (1.2, 1.4)      | 1.9 (1.7, 2.0)      | 1.8 (1.7, 1.9)      | 1.9 (1.6, 2.1)     | 1.8 (1.8, 1.9)     | 2.1 (1.9, 2.3)     |
| <b>ARMS2 GRS: median (IQR)</b>                                                          |                                | 0.0 (0, 0)           | 1.1 (1.1, 2.1)       | 1.1 (0, 1.1)        | 2.1 (2.1, 2.1)      | 0.0 (0, 0)          | 2.1 (1.1, 2.1)      | 1.1 (1.1, 2.1)     | 0.0 (0, 1.1)       | 0.0 (0, 0)         |

Supplementary Table 3. Results: p-values for pairwise comparisons of the genetic clusters, according to phenotypic characteristics, by t test.

| Phenotypic characteristic                         | I vs J |           | K vs L |           |
|---------------------------------------------------|--------|-----------|--------|-----------|
|                                                   | Raw    | Adjusted* | Raw    | Adjusted* |
| Age                                               | 0.71   | 1.00      | 0.63   | 1.00      |
| Sex                                               | 0.052  | 1.00      | 0.088  | 1.00      |
| White / non-white                                 | 0.067  | 1.00      | 1.00   | 1.00      |
| Educational level 1 (y/n)                         | 0.92   | 1.00      | 0.57   | 1.00      |
| Educational level 2 (y/n)                         | 0.65   | 1.00      | 0.51   | 1.00      |
| Educational level 3 (y/n)                         | 0.48   | 1.00      | 0.88   | 1.00      |
| Smoking level 1 (y/n)                             | 0.42   | 1.00      | 0.18   | 1.00      |
| Smoking level 2 (y/n)                             | 0.66   | 1.00      | 0.32   | 1.00      |
| Smoking level 3 (y/n)                             | 0.42   | 1.00      | 0.45   | 1.00      |
| Square root of GA area (mm)                       | 0.26   | 1.00      | 0.38   | 1.00      |
| GA central involvement (y/n)†                     | 0.86   | 1.00      | 0.47   | 1.00      |
| GA configuration level 1 (y/n)†                   | 0.014  | 0.64      | 0.007  | 0.35      |
| GA configuration level 2 (y/n)†                   | 0.23   | 1.00      | 0.088  | 1.00      |
| GA configuration level 3 (y/n)†                   | 0.49   | 1.00      | 0.26   | 1.00      |
| GA configuration level 4 (y/n)†                   | 0.13   | 1.00      | 0.21   | 1.00      |
| GA configuration level 5 (y/n)†                   | 0.37   | 1.00      | 0.71   | 1.00      |
| GA fellow eye involvement (y/n)†                  | 0.70   | 1.00      | 0.77   | 1.00      |
| Square root of GA enlargement rate (mm/year)      | 0.020  | 0.86      | 0.023  | 0.95      |
| Total drusen area within AREDS grid (7 levels)†   | 0.50   | 1.00      | 0.26   | 1.00      |
| Maximum drusen size within AREDS grid (4 levels)† | 0.95   | 1.00      | 0.82   | 1.00      |
| Calcified drusen presence (y/n)†                  | 0.58   | 1.00      | 0.69   | 1.00      |
| Reticular pseudodrusen score (0.0-1.0)†           | 0.79   | 1.00      | 0.23   | 1.00      |
| BCVA (ETDRS letter score)†                        | 0.18   | 1.00      | 0.23   | 1.00      |
| GA central involvement (y/n)‡                     | 0.27   | 1.00      | 0.41   | 1.00      |
| GA configuration level 1 (y/n)‡                   | 0.008  | 0.37      | 0.023  | 0.96      |
| GA configuration level 2 (y/n)‡                   | 0.75   | 1.00      | 0.64   | 1.00      |
| GA configuration level 3 (y/n)‡                   | 0.077  | 1.00      | 0.34   | 1.00      |
| GA configuration level 4 (y/n)‡                   | 0.003  | 0.16      | 0.083  | 1.00      |
| GA configuration level 5 (y/n)‡                   | 0.62   | 1.00      | 0.88   | 1.00      |
| GA fellow eye involvement (y/n)‡                  | 0.52   | 1.00      | 0.39   | 1.00      |
| Total drusen area within AREDS grid (7 levels)‡   | 0.48   | 1.00      | 0.10   | 1.00      |
| Maximum drusen size within AREDS grid (4 levels)‡ | 0.18   | 1.00      | 0.20   | 1.00      |
| Calcified drusen presence (y/n)‡                  | 0.93   | 1.00      | 0.70   | 1.00      |
| Reticular pseudodrusen score (0.0-1.0)‡           | 0.72   | 1.00      | 0.38   | 1.00      |
| BCVA rate (change in ETDRS letter score/year)‡    | 0.14   | 1.00      | 0.96   | 1.00      |

\* Adjusted for multiple testing: adjusted for the 35 phenotypic characteristics by MULTTEST bootstrap and adjusted for the 2 cluster groupings by multiplying by 2.

† considered cross-sectionally

‡ considered longitudinally (as defined in Table 1)

Supplementary Figure 21. CART classification trees and related confusion matrices and performance metrics for the clusters identified by genetic characteristics, based on CART classification by the same genetic characteristics.

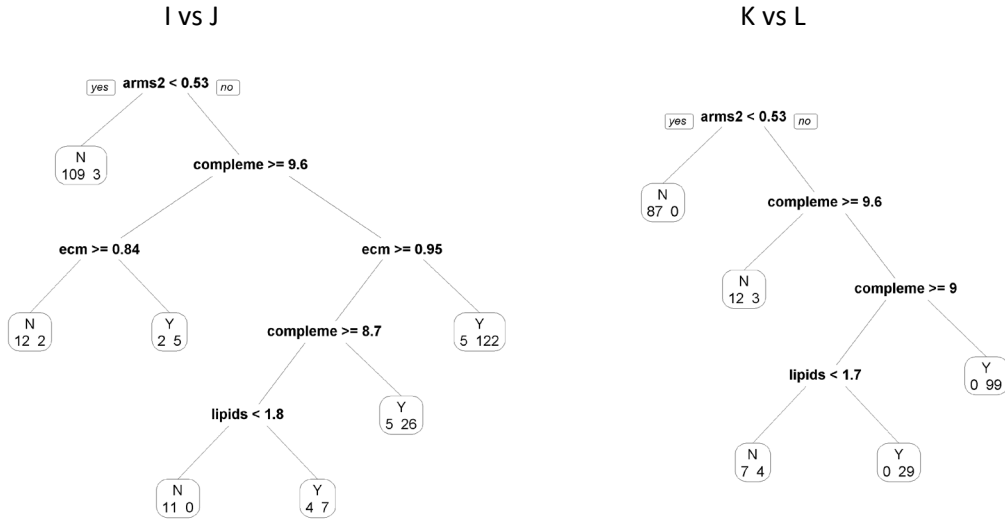

**Cluster I vs J**  
**Confusion matrix**

| predicted | N   | Y   |
|-----------|-----|-----|
| N         | 132 | 5   |
| Y         | 16  | 160 |

Accuracy = 0.932907  
 Sensitivity = 0.969697  
 Specificity = 0.891892

**Cluster K vs L**  
**Confusion matrix**

| predicted | N   | Y   |
|-----------|-----|-----|
| N         | 106 | 7   |
| Y         | 0   | 128 |

Accuracy = 0.970954  
 Sensitivity = 0.948148  
 Specificity = 1.000000

Supplementary Figure 22. Results of logistic regression with LASSO, with related confusion matrices and performance metrics, for the clusters identified by genetic characteristics, based on CART classification by the same genetic characteristics.

Log odds ratio estimates from logistic regression with LASSO

|                                        |  |                         |
|----------------------------------------|--|-------------------------|
| <b>Coefficients for cluster I vs J</b> |  | <b>cluster K vs L</b>   |
| (Intercept) 31.783035                  |  | (Intercept) 3.137322    |
| complement -7.010674                   |  | complement -1.156121    |
| lipids 19.859494                       |  | lipids 2.188386         |
| ecm -30.966055                         |  | ecm .                   |
| arms2 24.786952                        |  | arms2 4.188201          |
|                                        |  |                         |
| <b>Confusion matrix</b>                |  | <b>Confusion matrix</b> |
| pred N Y                               |  | pred N Y                |
| N 148 0                                |  | N 97 0                  |
| Y 0 165                                |  | Y 9 135                 |
| Accuracy = 1.000000                    |  | Accuracy = 0.962656     |
| Sensitivity = 1.000000                 |  | Sensitivity = 1.000000  |
| Specificity = 1.000000                 |  | Specificity = 0.915094  |

Supplementary Figure 23. Cohen's effect sizes for the clusters identified by genetic characteristics, based on CART classification by the same genetic characteristics.

### Cluster I vs J

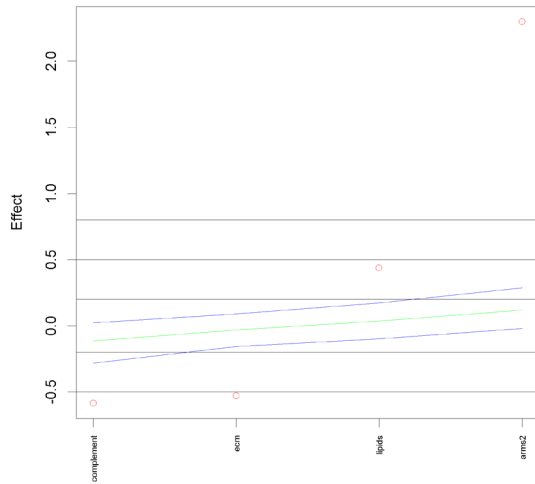

### Cluster K vs L

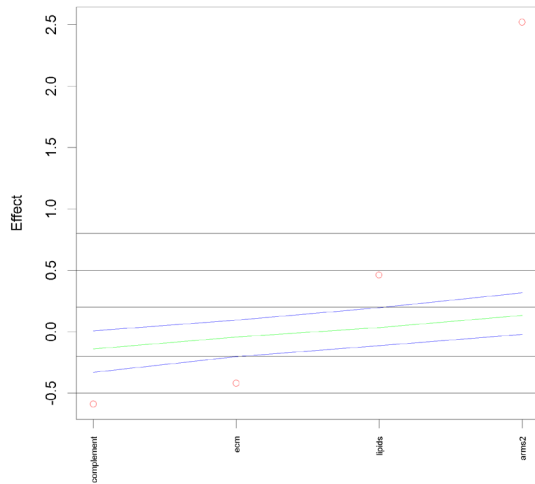

The effect sizes are plotted in ascending order on the y axis. Horizontal reference lines mark effect sizes for  $\pm 0.2$ ,  $\pm 0.5$ , and  $\pm 0.8$ . Points are colored red or black according to whether they are for Cohen's  $d$  (continuous features) or Cohen's  $h$  (binary features). The green and blue curves are expected values and 95% confidence intervals from a simulation of 1000 iterations under the null hypothesis that the cluster is unrelated to the features.

Supplementary Figure 24. CART classification trees and related confusion matrices and performance metrics for the clusters identified by genetic characteristics, based on CART classification by the phenotypic characteristics.

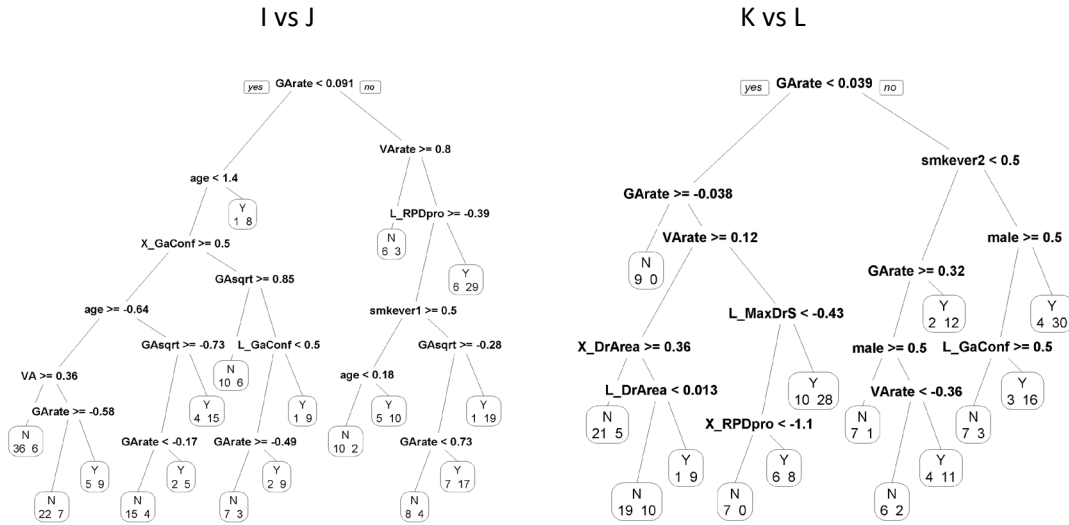

**Cluster I vs J**  
**Confusion matrix**

| predicted | N   | Y   |
|-----------|-----|-----|
| N         | 114 | 35  |
| Y         | 34  | 130 |

**Accuracy = 0.779553**  
**Sensitivity = 0.787879**  
**Specificity = 0.770270**

**Cluster K vs L**  
**Confusion matrix**

| predicted | N  | Y   |
|-----------|----|-----|
| N         | 76 | 21  |
| Y         | 30 | 114 |

**Accuracy = 0.788382**  
**Sensitivity = 0.844444**  
**Specificity = 0.716981**

Supplementary Figure 25. Cohen’s effect sizes for the clusters identified by genetic characteristics, based on CART classification by the phenotypic characteristics.

Cluster I vs J

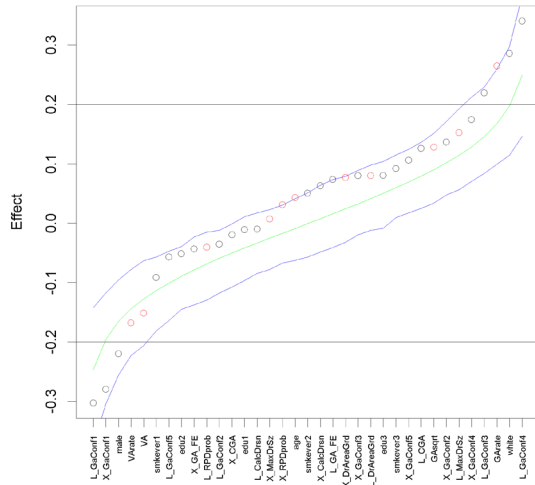

Cluster K vs L

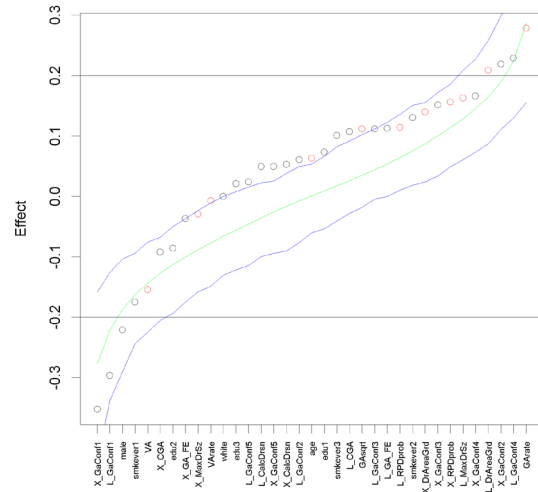

The effect sizes are plotted in ascending order on the y axis. Horizontal reference lines mark effect sizes for  $\pm 0.2$ ,  $\pm 0.5$ , and  $\pm 0.8$ . Points are colored red or black according to whether they are for Cohen’s  $d$  (continuous features) or Cohen’s  $h$  (binary features). The green and blue curves are expected values and 95% confidence intervals from a simulation of 1000 iterations under the null hypothesis that the cluster is unrelated to the features.

In all figures, the dots are mostly inside the blue intervals, suggesting that there is no strong evidence that the phenotypic variables are closely related to the genetic clusters.

Note: the logistic regression with LASSO failed. Specifically, all coefficients except the intercept term were set to 0, such that the predicted classification for every participant was either always inside or always outside the cluster. Essentially, the method failed to use the phenotypic data to classify the participants in a way similar to the clusters.
